# Supplementary material for: Electronic substituent effect on the conformation of a phenylalanine-incorporated cyclic peptide
Source: Royal Society of Chemistry journal article supplement (doi:10.1039/d3ra07836a), 2024-01-01
Supplement: d3ra07836a1.pdf [file d3ra07836a1.pdf]

## Electronic supporting information for

“Electronic substituent effect on conformation of phenylalanine-incorporated cyclic peptide”

Akiko Asano\*, Yukiko Kawanami, Mao Fujita, Yuta Yano, Rio Ide, Katsuhiko Minoura, Takuma Kato and Mitsunobu Doi

*Faculty of Pharmacy, Osaka Medical and Pharmaceutical University, 4-20-1 Nasahara, Takatsuki, Osaka 569-1094, Japan.*

### Contents:

|                                                                                                                                                             |             |
|-------------------------------------------------------------------------------------------------------------------------------------------------------------|-------------|
| Synthesis and characterization of the peptides <b>1, 2, 3, 6, 7, 8, 9</b> and <b>10</b> .....                                                               | Page 2-5    |
| <sup>1</sup> H NMR spectra for peptides <b>1, 2, 3, 6, 7, 8, 9</b> and <b>10</b> .....                                                                      | Page 6-29   |
| Crystallographic data for peptides <b>2, 3, 6, 7, 8</b> and <b>9</b> .....                                                                                  | Page 30, 31 |
| Hydrogen bonds in the crystal structures of <b>2, 3, 6, 7, 8</b> and <b>9</b> .....                                                                         | Page 32     |
| The CH···π contacts within the folded forms of <b>2</b> and <b>4</b> .....                                                                                  | Page 33,34  |
| Thermodynamic parameters and van't Hoff plots for peptides <b>1, 2, 3, 5, 6, 7, 8, 9</b> and <b>10</b> .....                                                | Page 35-43  |
| Coupling constants ( <sup>2</sup> J <sub>β1β2</sub> , <sup>3</sup> J <sub>αβ1</sub> and <sup>3</sup> J <sub>αβ2</sub> ) of Phe(X) residue at 273-333 K..... | Page 44     |
| Chemical structure of <i>d</i> ASC and T3ASC as reference peptides.....                                                                                     | Page 45     |

## Synthesis and characterization of the peptides 1, 2, 3, 6, 7, 8, 9 and 10.

### General Experimental Methods

Pure products were obtained after liquid chromatography using Merck silica gel 60 (40-63  $\mu\text{m}$ ). Analytical thin-layer chromatography was carried out on Merck silica gel F<sub>254</sub> plates with the following solvent system (v/v); chloroform : methanol : acetic acid (95 : 10 : 3). The plates were visualized with UV light ( $\lambda = 254 \text{ nm}$ ) and revealed with a 5 % solution of ninhydrin in ethanol. <sup>1</sup>H NMR spectra were recorded on an Agilent DD2 600-MHz NMR spectrometer (Agilent Technologies, California, USA). Peptide concentrations were about 5.0 mM in CD<sub>3</sub>CN. Chemical shifts were measured relative to internal trimethylsilane at 0.00 ppm. The protons were assigned using two dimensional correlated spectroscopy (2D-COSY) and rotating-frame Overhauser effect spectroscopy (ROESY; mixing time = 500 ms). Low-resolution mass spectra (LR-MS) were obtained by using matrix-assisted laser desorption ionization (MALDI-TOF) mass spectroscopy on a Bruker microflex LRF (Bruker, Massachusetts, USA).

### Synthesis of Boc-D-Val(Thz)-OMe

Boc-D-Val(Thz)-OMe was prepared according to previous report (Y. Hamada *et. al.*, *J. Org. Chem.*, 1987, **52**, 1252-1255) (Scheme S1). N-(*tert*-butoxycarbonyl)-D-valine (Boc-D-Val-OH) was first converted to the corresponding methyl ester by using methyl iodide in the presence of potassium hydrogen carbonate in *N, N*-dimethylformamide (DMF) at room temperature. The methyl ester was reduced with lithium chloride-sodium borohydride in tetrahydrofuran (THF) to give the amino alcohol derivative. Oxidation of the amino alcohol derivative was conveniently accomplished by the dimethyl sulfoxide (DMSO) oxidation using sulfur trioxide-pyridine complex (Py·SO<sub>3</sub>) in the presence of trimethylamine (Et<sub>3</sub>N), giving the amino aldehyde derivative. Condensation of the amino aldehyde derivative with L-cysteine methyl ester (H-L-Cys-OMe) afforded the thiazolidine derivative as a mixture of C-2 epimers. Oxidation of the thiazolidine derivative to the Boc-D-Val(Thz)-OMe was performed with activated manganese dioxide (Sigma-Aldrich Co. Llc., St. Louis, USA) in benzene.

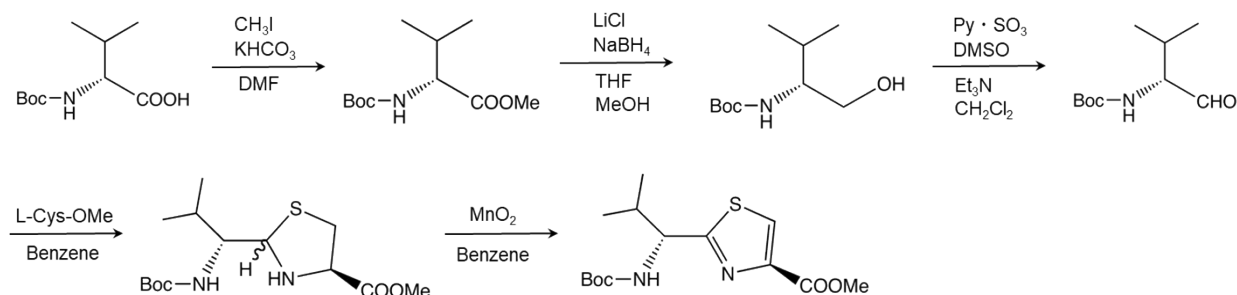

**Scheme S1**

### General procedure for the condensation

Peptides were synthesized by a conventional liquid-phase method according to Scheme S2. The liner peptide were synthesized using 1-hydroxy-benzotriazole (HOBt) (Watanabe Chemical Ind. Ltd., Hiroshima, Japan) and 1-ethyl-3-(3-dimethylaminopropyl)carbodiimide hydrochloride (EDC·HCl) (Watanabe Chemical Ind. Ltd., Hiroshima, Japan), and cyclization was conducted with benzotriazolylxy-tris(pyrrolidino)-phosphonium hexafluorophosphate (PyBOP) (Watanabe Chemical Ind. Ltd., Hiroshima, Japan) in the presence of 4-dimethylaminopyridine (DMAP) (Nacalai tesque, Kyoto, Japan).

| Phe(X)                       | <i>allo</i> -Thr         | D-Val(Thz)               | Ile                          | <i>allo</i> -Thr             | D-Val(Thz) |
|------------------------------|--------------------------|--------------------------|------------------------------|------------------------------|------------|
|                              |                          |                          |                              | Boc-OMe<br>4MHCl/Dioxane     |            |
|                              |                          |                          |                              | Boc-OH H-OMe<br>EDC·HCl/HOBt |            |
|                              | Boc-OMe<br>4MHCl/Dioxane |                          |                              | Boc-OMe<br>4MHCl/Dioxane     |            |
| Boc-OH H-OMe<br>EDC·HCl/HOBt |                          | OMe                      | Boc-OH H-OMe<br>EDC·HCl/HOBt |                              | OMe        |
| Boc-OMe                      |                          | OMe                      | Boc-OMe                      |                              | OMe        |
| Boc-OMe                      |                          | 2MNaOHaq                 | 4MHCl/Dioxane                |                              | OMe        |
| Boc-OMe                      |                          | OH H-OMe<br>EDC·HCl/HOBt |                              |                              | OMe        |
| Boc-OMe                      |                          |                          |                              |                              | OMe        |
| Boc-OMe                      |                          |                          |                              |                              | 2MNaOHaq   |
| Boc-OMe                      |                          |                          |                              |                              | OH         |
| 4MHCl/Dioxane                |                          |                          |                              |                              | OH         |
| H                            |                          | PyBOP                    |                              |                              | )          |
| Cyclo(                       |                          |                          |                              |                              | )          |

**1**; X=OCH<sub>3</sub>, **2**; X=CH<sub>3</sub>, **3**; X=C(CH<sub>3</sub>)<sub>3</sub>, **6**; X=I

**7**; X=Cl, **8**; X=Br, **9**; X=CF<sub>3</sub>, **10**; X=NO<sub>2</sub>

## Scheme S2

### Synthesis of oxazoline rings

The oxazoline (Oxz) rings were formed by reacting the Ile-*allo*-Thr moiety with bis(2-methoxyethyl)aminosulfur trifluoride (Deoxo-Fluor) (Fujifilm Wako Pure Chemical, Osaka, Japan) according to previous report (A. J. Phillips *et. al.*, *Org. Lett.*, 2000, **2**, 1165-1168) (Scheme S3).

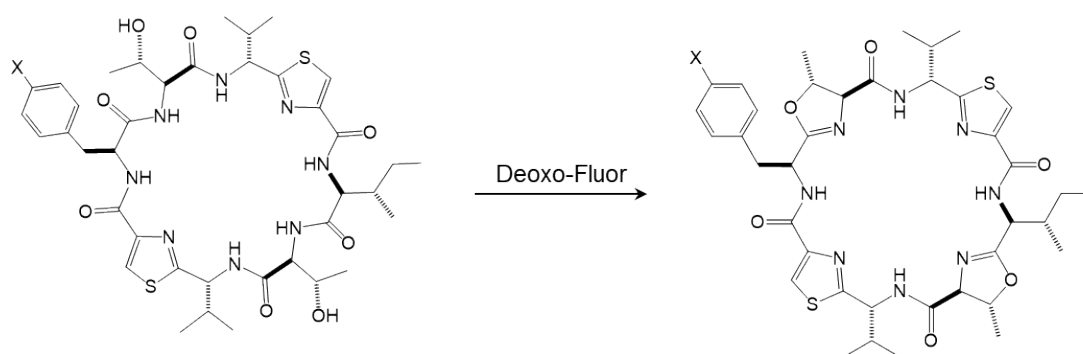

- 1**; X=OCH<sub>3</sub>, **2**; X=CH<sub>3</sub>, **3**; X=C(CH<sub>3</sub>)<sub>3</sub>, **6**; X=I  
**7**; X=Cl, **8**; X=Br, **9**; X=CF<sub>3</sub>, **10**; X=NO<sub>2</sub>

## Scheme S3

**Table S1.** MALDI-TOF Mass spectroscopic data for **1, 2, 3, 6, 7, 8, 9** and **10**.

| Peptide   | Mass type           | Calculated mass | Observed mass |
|-----------|---------------------|-----------------|---------------|
| <b>1</b>  | [M+H] <sup>+</sup>  | 821.35          | 821.59        |
|           | [M+Na] <sup>+</sup> | 843.33          | 843.58        |
|           | [M+K] <sup>+</sup>  | 859.30          | ND            |
| <b>2</b>  | [M+H] <sup>+</sup>  | 805.35          | 805.57        |
|           | [M+Na] <sup>+</sup> | 827.33          | 827.56        |
|           | [M+K] <sup>+</sup>  | 843.31          | ND            |
| <b>3</b>  | [M+H] <sup>+</sup>  | 847.40          | ND            |
|           | [M+Na] <sup>+</sup> | 869.38          | 869.69        |
|           | [M+K] <sup>+</sup>  | 885.36          | ND            |
| <b>6</b>  | [M+H] <sup>+</sup>  | 917.23          | 917.54        |
|           | [M+Na] <sup>+</sup> | 939.22          | 939.54        |
|           | [M+K] <sup>+</sup>  | 955.19          | ND            |
| <b>7</b>  | [M+H] <sup>+</sup>  | 825.30          | 825.53        |
|           | [M+Na] <sup>+</sup> | 847.28          | 847.52        |
|           | [M+K] <sup>+</sup>  | 863.25          | ND            |
| <b>8</b>  | [M+H] <sup>+</sup>  | 869.55          | 869.53        |
|           | [M+Na] <sup>+</sup> | 891.23          | 891.51        |
|           | [M+K] <sup>+</sup>  | 907.20          | ND            |
| <b>9</b>  | [M+H] <sup>+</sup>  | 859.32          | 859.66        |
|           | [M+Na] <sup>+</sup> | 881.31          | 881.65        |
|           | [M+K] <sup>+</sup>  | 897.28          | 897.62        |
| <b>10</b> | [M+H] <sup>+</sup>  | 836.32          | 836.68        |
|           | [M+Na] <sup>+</sup> | 858.30          | 858.65        |
|           | [M+K] <sup>+</sup>  | 874.28          | 874.63        |

# <sup>1</sup>H NMR spectra of peptides 1

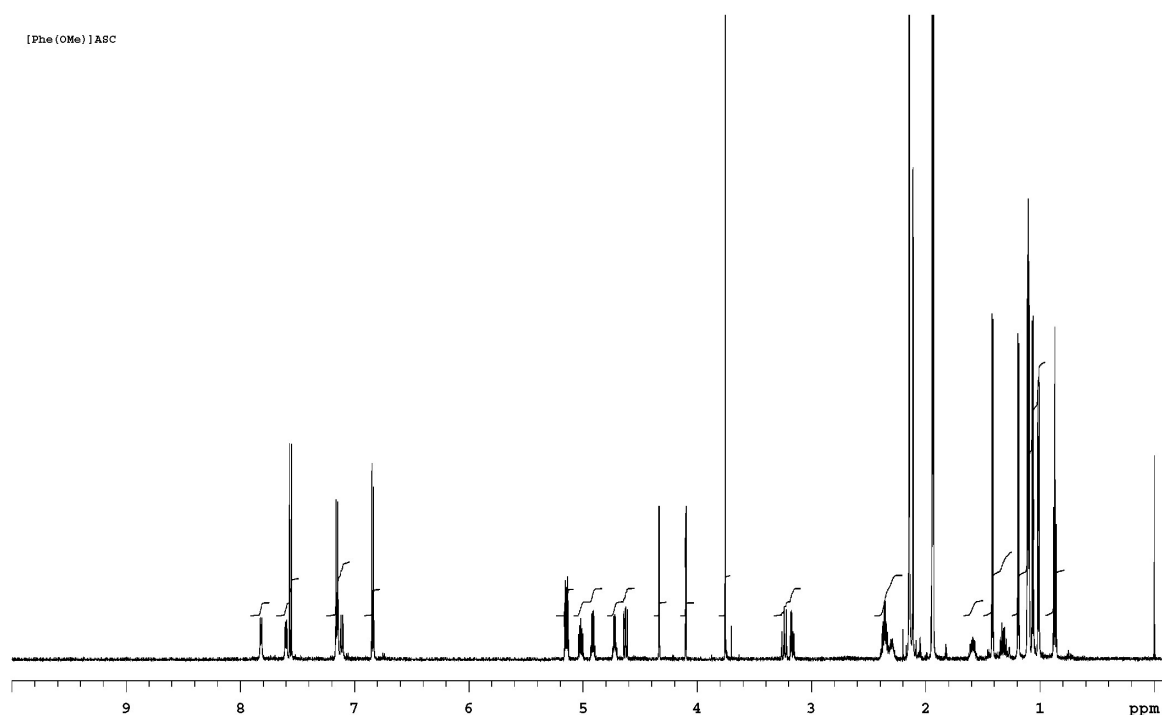

Fig. S1 1D <sup>1</sup>H NMR spectrum of peptide 1 in CD<sub>3</sub>CN at 298 K.

| Residue               | $\delta$ HN (ppm)<br><sup>3</sup> J (Hz) | $\delta$ H $\alpha$ (ppm)<br><sup>3</sup> J (Hz) | $\delta$ H $\beta$ (ppm)<br><sup>3</sup> J (Hz)                              | $\delta$ H $\gamma$ (ppm)<br><sup>3</sup> J (Hz)                                        | $\delta$ H $\delta$ (ppm)<br><sup>3</sup> J (Hz) | $\delta$ Other protons (ppm)<br><sup>3</sup> J (Hz) |
|-----------------------|------------------------------------------|--------------------------------------------------|------------------------------------------------------------------------------|-----------------------------------------------------------------------------------------|--------------------------------------------------|-----------------------------------------------------|
| Phe(OMe) <sup>1</sup> | 7.82<br>d, J = 6.6                       | 5.02<br>ddd, J = 11.4, 6.6, 5.4                  | $\gamma$ CH <sub>2</sub> 3.24, 3.17<br>dd, J = 13.2, 11.4, dd, J = 13.2, 5.4 |                                                                                         | 7.16<br>d, J = 9.0                               | $\epsilon$ H 6.84, OMe 3.74<br>d, J = 9.0, s        |
| Oxz <sup>2</sup>      |                                          | 4.10<br>d, J = 3.6                               | 4.73<br>qd, J = 6.0, 3.6                                                     | 1.19<br>d, J = 6.0                                                                      |                                                  |                                                     |
| D-Val <sup>3or7</sup> | 7.11<br>d, J = 10.2                      | 5.15<br>dd, J = 10.2, 4.8                        | 2.37<br>m                                                                    | $\gamma$ CH <sub>3</sub> 1.11, $\gamma'$ CH <sub>3</sub> 1.10<br>d, J = 6.6, d, J = 6.6 |                                                  |                                                     |
| Thz <sup>4or8</sup>   |                                          |                                                  |                                                                              |                                                                                         |                                                  | 7.55<br>s                                           |
| Ile <sup>5</sup>      | 7.60<br>d, J = 7.8                       | 4.63<br>dd, J = 10.2, 7.8                        | 2.30<br>m                                                                    | $\gamma$ CH <sub>2</sub> 1.59, 1.32<br>m, m                                             | $\gamma$ CH <sub>3</sub> 1.01<br>d, J = 6.6      | 0.87<br>t, J = 7.2                                  |
| Oxz <sup>6</sup>      |                                          | 4.34<br>d, J = 4.2                               | 4.92<br>qd, J = 6.6, 4.2                                                     | 1.42<br>d, J = 6.6                                                                      |                                                  |                                                     |
| D-Val <sup>3or7</sup> | 7.15<br>d, J = 10.2                      | 5.14<br>dd, J = 10.2, 4.8                        | 2.36<br>m                                                                    | $\gamma$ CH <sub>3</sub> 1.10, $\gamma'$ CH <sub>3</sub> 1.07<br>d, J = 7.2, d, J = 7.2 |                                                  |                                                     |
| Thz <sup>4or8</sup>   |                                          |                                                  |                                                                              |                                                                                         |                                                  | 7.60<br>s                                           |

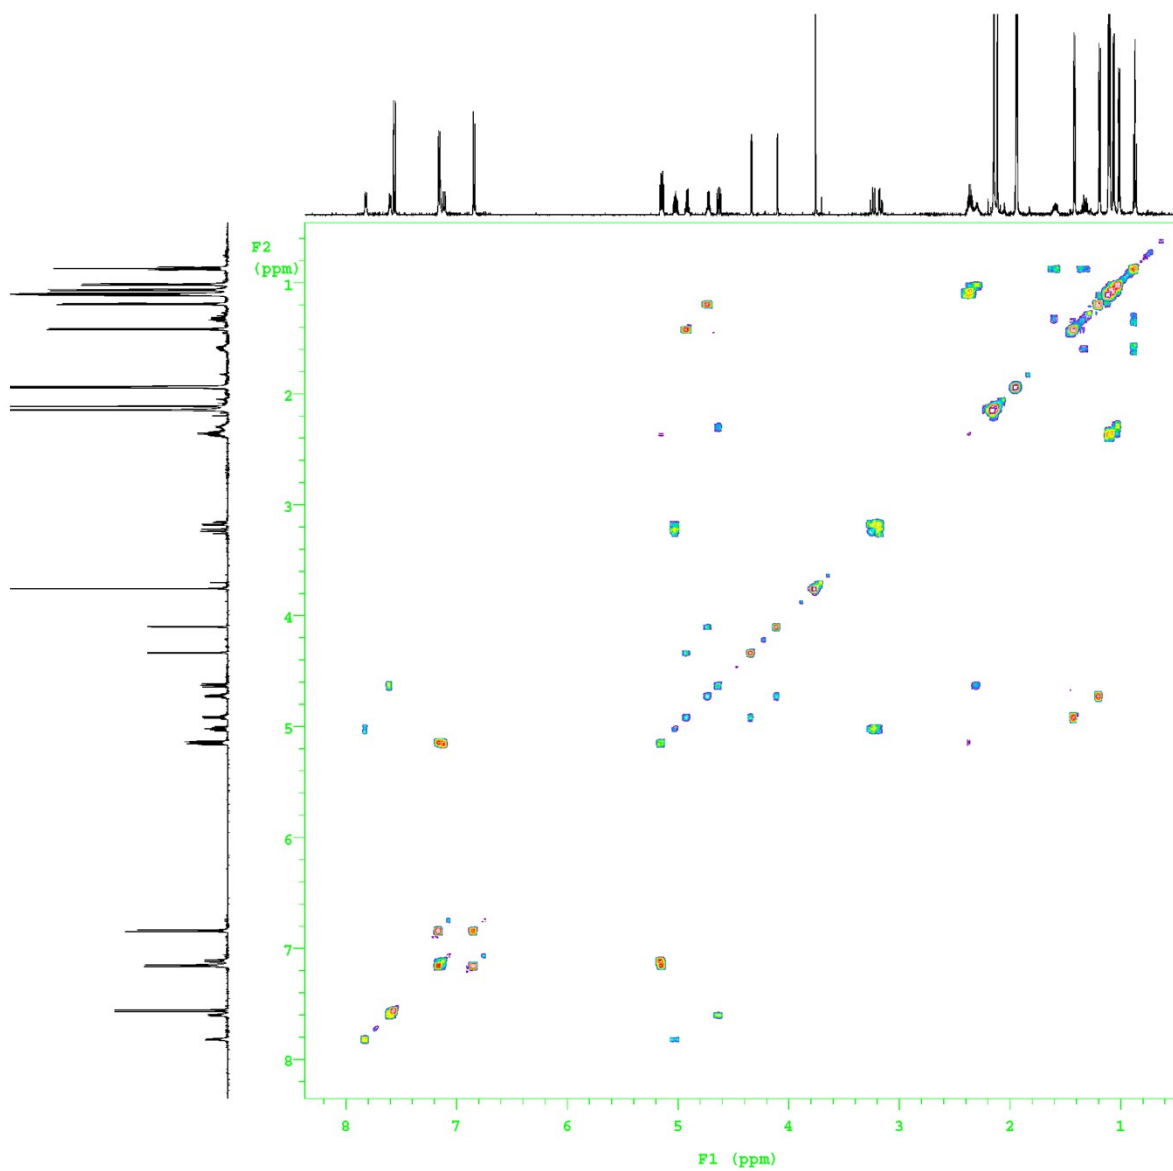

Fig. S2 2D  $^1\text{H}$ - $^1\text{H}$  COSY spectrum of peptide 1 in  $\text{CD}_3\text{CN}$  at 298 K.

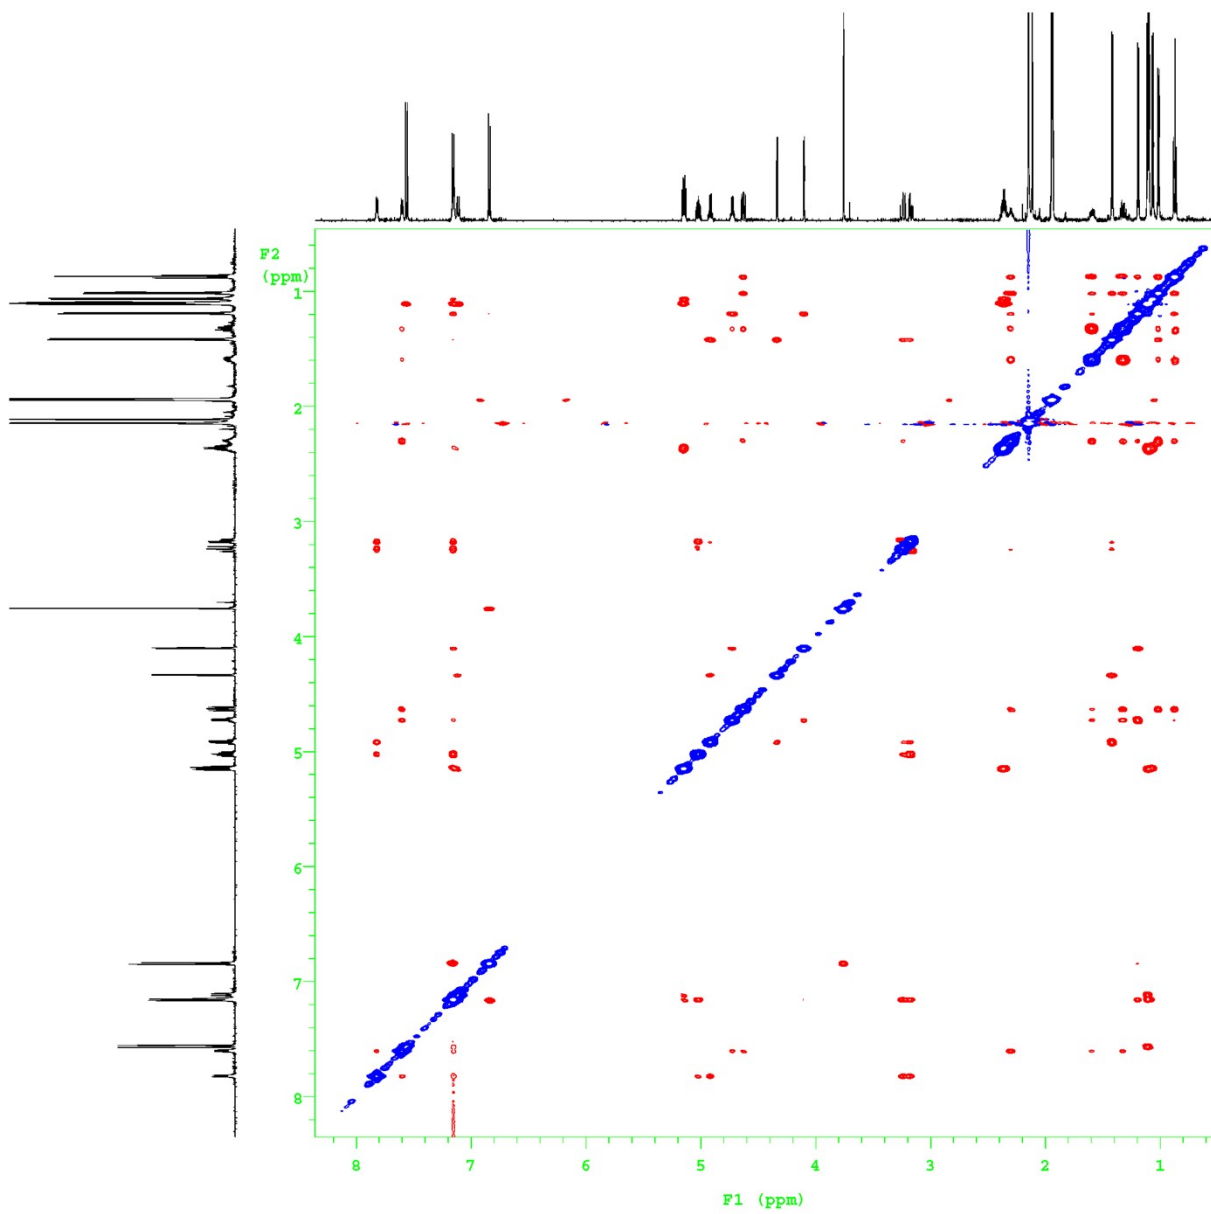

**Fig. S3** 2D  $^1\text{H}$ - $^1\text{H}$  ROESY spectrum of peptide 1 in  $\text{CD}_3\text{CN}$  at 298 K.



## <sup>1</sup>H NMR spectra of peptides 2

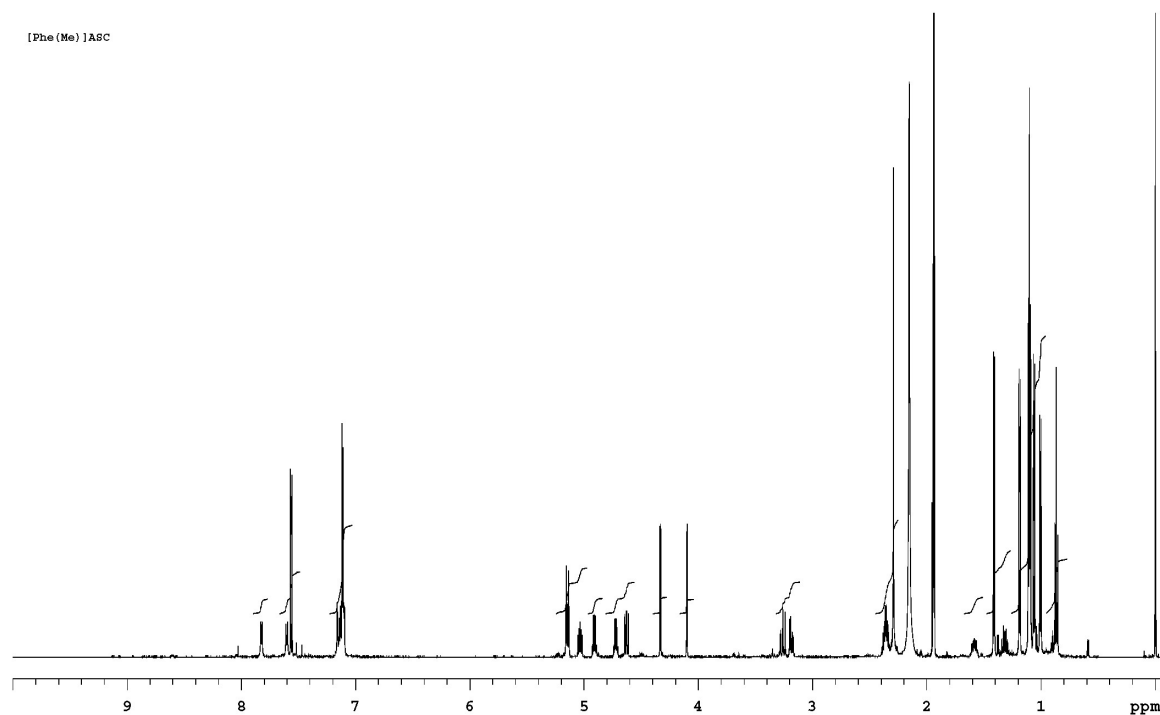

**Fig. S4** 1D <sup>1</sup>H NMR spectrum of peptide **2** in CD<sub>3</sub>CN at 298 K.

| Residue              | $\delta$ HN (ppm)<br><sup>3</sup> J (Hz) | $\delta$ H $\alpha$ (ppm)<br><sup>3</sup> J (Hz) | $\delta$ H $\beta$ (ppm)<br><sup>3</sup> J (Hz)                              | $\delta$ H $\gamma$ (ppm)<br><sup>3</sup> J (Hz)                                        | $\delta$ H $\delta$ (ppm)<br><sup>3</sup> J (Hz) | $\delta$ Other protons (ppm)<br><sup>3</sup> J (Hz) |
|----------------------|------------------------------------------|--------------------------------------------------|------------------------------------------------------------------------------|-----------------------------------------------------------------------------------------|--------------------------------------------------|-----------------------------------------------------|
| Phe(Me) <sup>1</sup> | 7.83<br>d, J = 6.6                       | 5.04<br>ddd, J = 11.4, 6.6, 5.4                  | $\gamma$ CH <sub>2</sub> 3.26, 3.19<br>dd, J = 13.2, 11.4, dd, J = 13.2, 5.4 |                                                                                         | 7.13<br>d, J = 8.4                               | $\epsilon$ H 7.10, Me 2.29<br>d, J = 7.8, s         |
| Oxz <sup>2</sup>     |                                          | 4.10<br>d, J = 3.6                               | 4.72<br>qd, J = 6.0, 3.6                                                     | 1.19<br>d, J = 6.6                                                                      |                                                  |                                                     |
| D-Val <sup>3</sup>   | 7.15<br>d, J = 10.2                      | 5.14<br>dd, J = 10.2, 3.6                        | 2.33<br>sept. d, J = 6.6, 3.6                                                | $\gamma$ CH <sub>3</sub> 1.10, $\gamma'$ CH <sub>3</sub> 1.06<br>d, J = 6.6, d, J = 6.6 |                                                  |                                                     |
| Thz <sup>4or8</sup>  |                                          |                                                  |                                                                              |                                                                                         |                                                  | 7.56<br>s                                           |
| Ile <sup>5</sup>     | 7.60<br>d, J = 7.8                       | 4.63<br>dd, J = 10.2, 7.8                        | 2.28<br>m                                                                    | $\gamma$ CH <sub>2</sub> 1.59, 1.38<br>m, m                                             | $\gamma$ CH <sub>3</sub> 1.01<br>d, J = 7.2      | 0.87<br>t, J = 7.2                                  |
| Oxz <sup>6</sup>     |                                          | 4.33<br>d, J = 4.2                               | 4.91<br>qd, J = 6.6, 3.6                                                     | 1.41<br>d, J = 6.6                                                                      |                                                  |                                                     |
| D-Va <sup>7</sup>    | 7.10<br>d, J = 10.2                      | 5.15<br>dd, J = 10.2, 3.6                        | 2.36<br>sept. d, J = 6.6, 3.6                                                | $\gamma$ CH <sub>3</sub> 1.11, $\gamma'$ CH <sub>3</sub> 1.10<br>d, J = 6.6, d, J = 6.6 |                                                  |                                                     |
| Thz <sup>4or8</sup>  |                                          |                                                  |                                                                              |                                                                                         |                                                  | 7.57<br>s                                           |

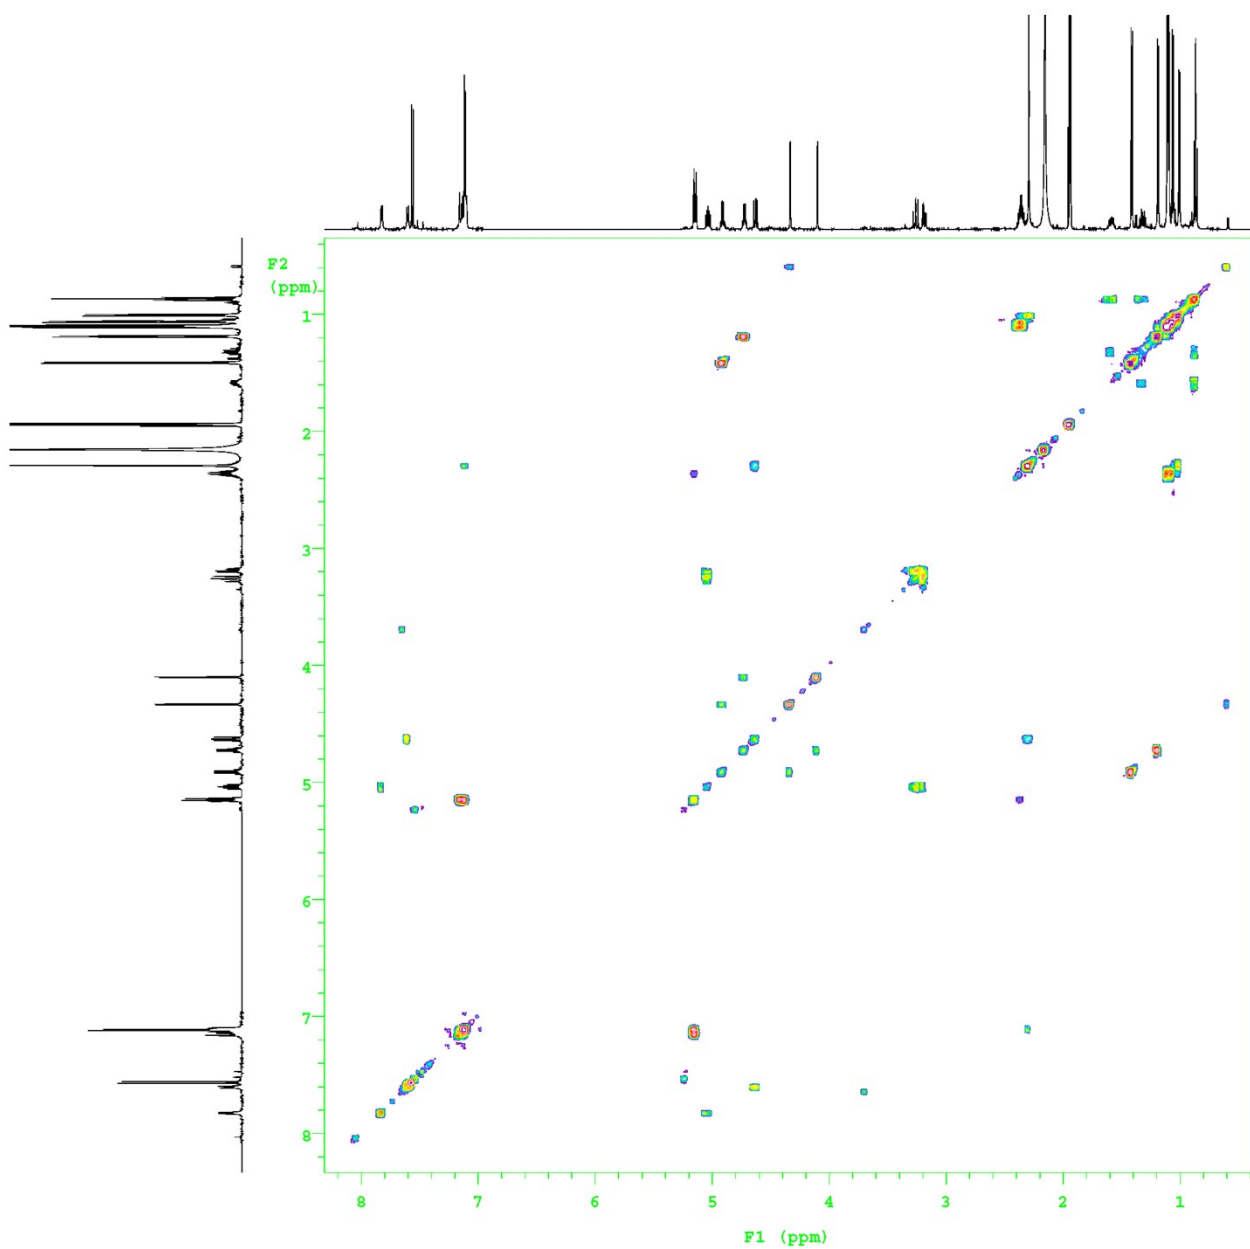

Fig. S5 2D  $^1\text{H}$ - $^1\text{H}$  COSY spectrum of peptide **2** in  $\text{CD}_3\text{CN}$  at 298 K.

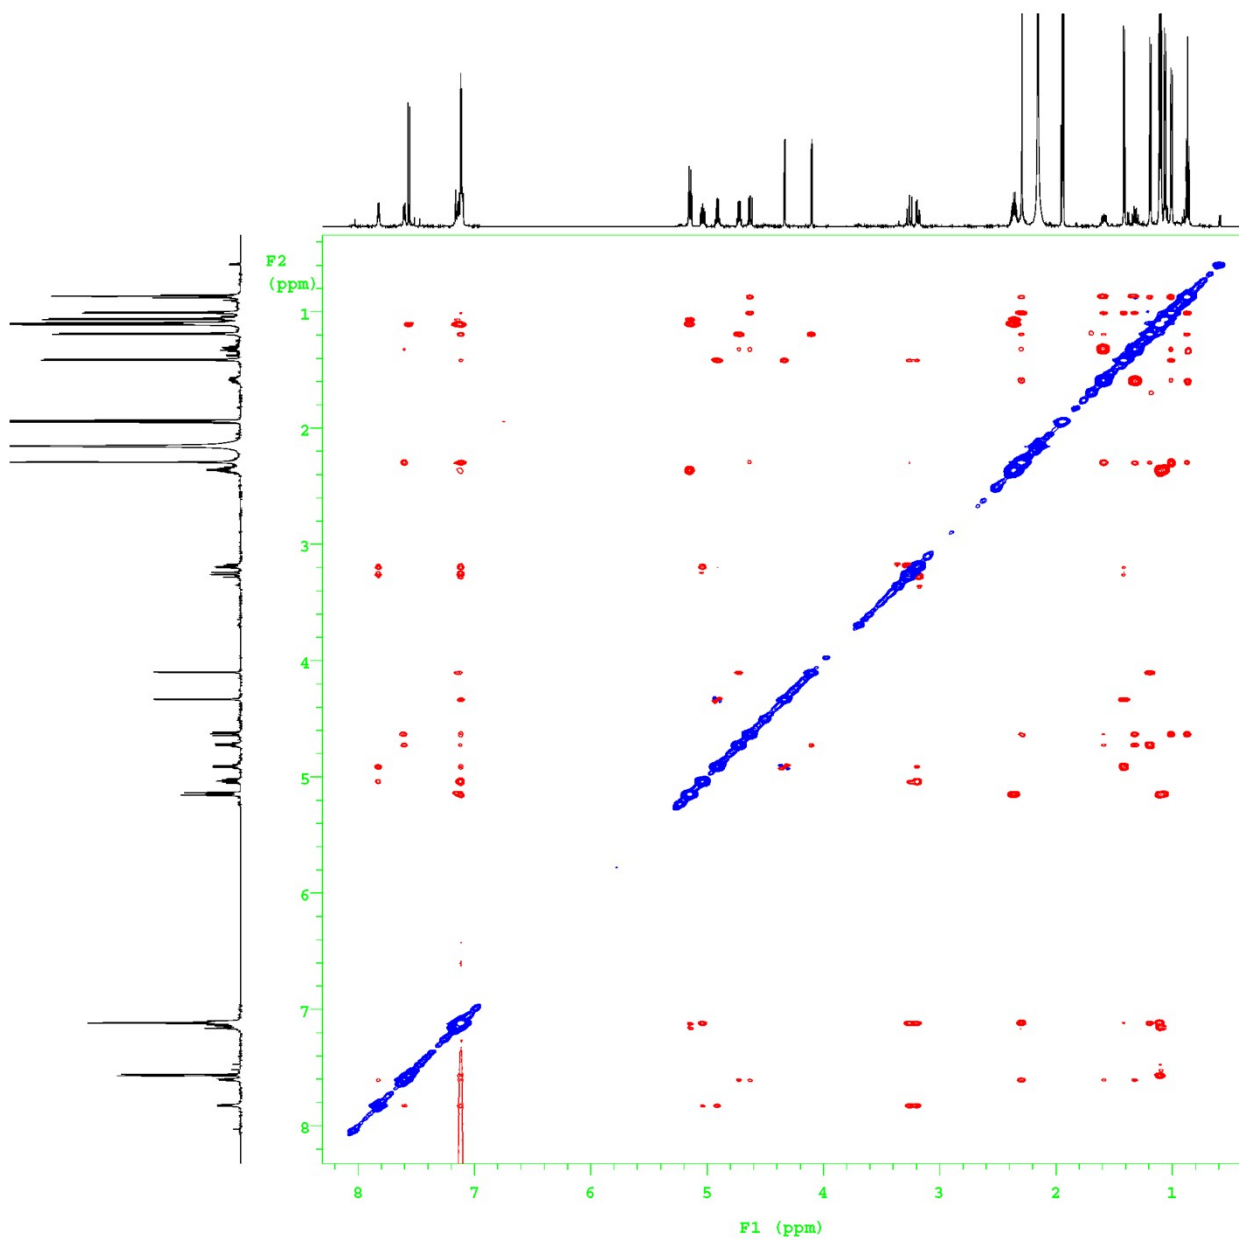

**Fig. S6** 2D  $^1\text{H}$ - $^1\text{H}$  ROESY spectrum of peptide **2** in  $\text{CD}_3\text{CN}$  at 298 K.

# <sup>1</sup>H NMR spectra of peptides 3

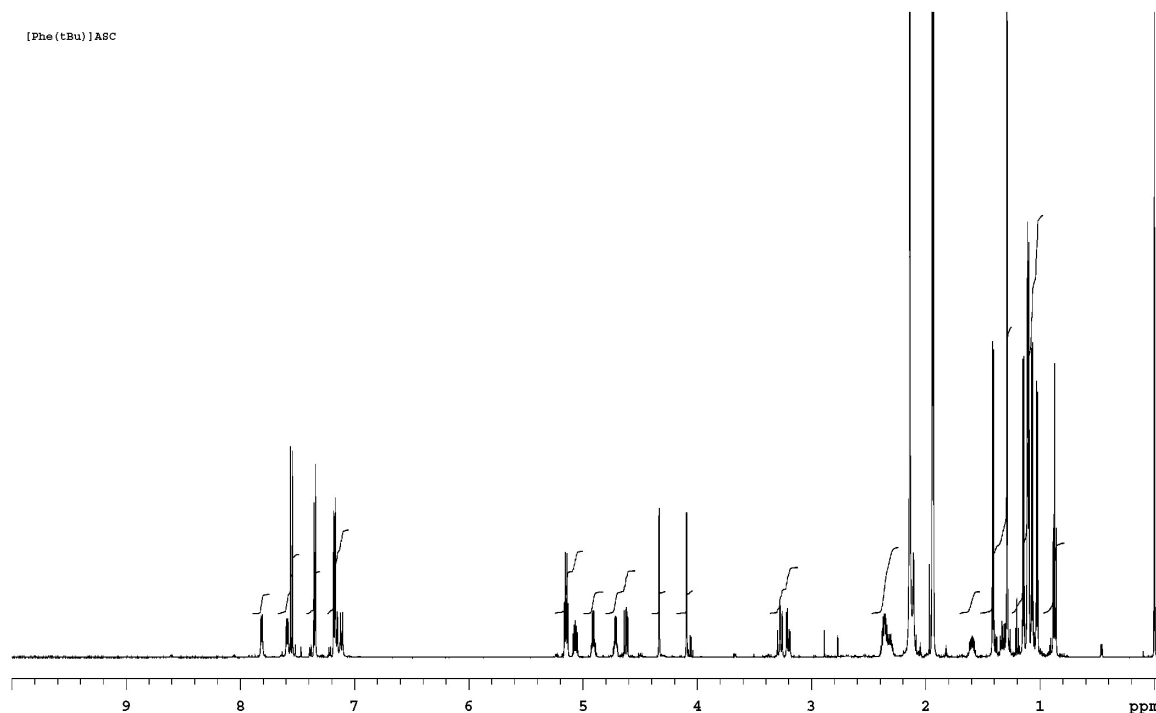

**Fig. S7** 1D <sup>1</sup>H NMR spectrum of peptide **3** in CD<sub>3</sub>CN at 298 K.

| Residue               | δ HN (ppm)<br><sup>3</sup> J (Hz) | δ Hα (ppm)<br><sup>3</sup> J (Hz) | δ Hβ (ppm)<br><sup>3</sup> J (Hz)                                    | δ Hγ (ppm)<br><sup>3</sup> J (Hz)                                       | δ Hδ (ppm)<br><sup>3</sup> J (Hz)   | δ Other protons (ppm)<br><sup>3</sup> J (Hz) |
|-----------------------|-----------------------------------|-----------------------------------|----------------------------------------------------------------------|-------------------------------------------------------------------------|-------------------------------------|----------------------------------------------|
| Phe(tBu) <sup>1</sup> | 7.81<br>d, J = 6.6                | 5.07<br>ddd, J = 11.4, 6.6, 5.4   | γCH <sub>2</sub> 3.28, 3.20<br>dd, J = 13.2, 11.4, dd, J = 13.2, 5.4 |                                                                         | 7.18<br>d, J = 8.4                  | εH 7.35, tBu 1.29<br>d, J = 8.4, s           |
| Oxz <sup>2</sup>      |                                   | 4.10<br>d, J = 3.6                | 4.72<br>qd, J = 6.0, 3.6                                             | 1.15<br>d, J = 6.0                                                      |                                     |                                              |
| D-Val <sup>3</sup>    | 7.16<br>d, J = 10.2               | 5.14<br>dd, J = 10.2, 6.6         | 2.36<br>m                                                            | γCH <sub>3</sub> 1.11, γ'CH <sub>3</sub> 1.07<br>d, J = 6.6, d, J = 6.6 |                                     |                                              |
| Thz <sup>4or8</sup>   |                                   |                                   |                                                                      |                                                                         |                                     | 7.55<br>s                                    |
| Ile <sup>5</sup>      | 7.59<br>d, J = 7.8                | 4.63<br>dd, J = 10.8, 7.8         | 2.32<br>m                                                            | γCH <sub>2</sub> 1.45, 1.31<br>m, m                                     | γCH <sub>3</sub> 1.03<br>d, J = 7.2 | 0.87<br>t, J = 7.8                           |
| Oxz <sup>6</sup>      |                                   | 4.34<br>d, J = 4.2                | 4.91<br>qd, J = 6.6, 4.2                                             | 1.41<br>d, J = 6.6                                                      |                                     |                                              |
| D-Va <sup>7</sup>     | 7.11<br>d, J = 10.2               | 5.15<br>dd, J = 10.2, 6.6         | 2.36<br>m                                                            | γCH <sub>3</sub> 1.11, γ'CH <sub>3</sub> 1.10<br>d, J = 6.6, d, J = 6.6 |                                     |                                              |
| Thz <sup>4or8</sup>   |                                   |                                   |                                                                      |                                                                         |                                     | 7.56<br>s                                    |

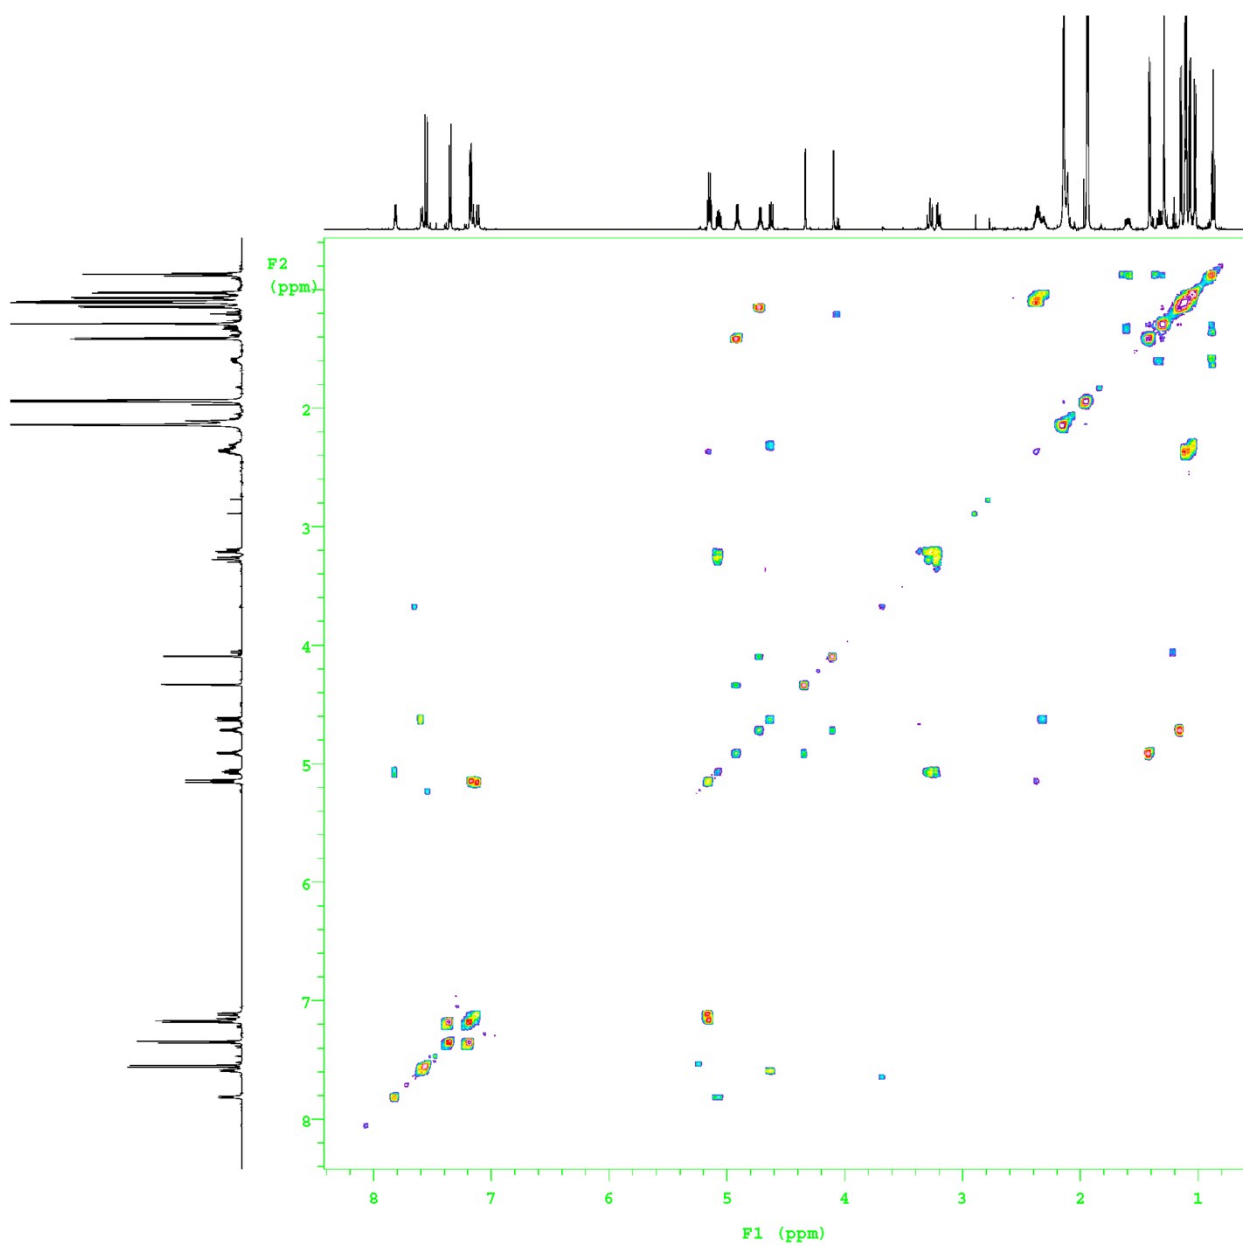

Fig. S8 2D  $^1\text{H}$ - $^1\text{H}$  COSY spectrum of peptide **3** in  $\text{CD}_3\text{CN}$  at 298 K.

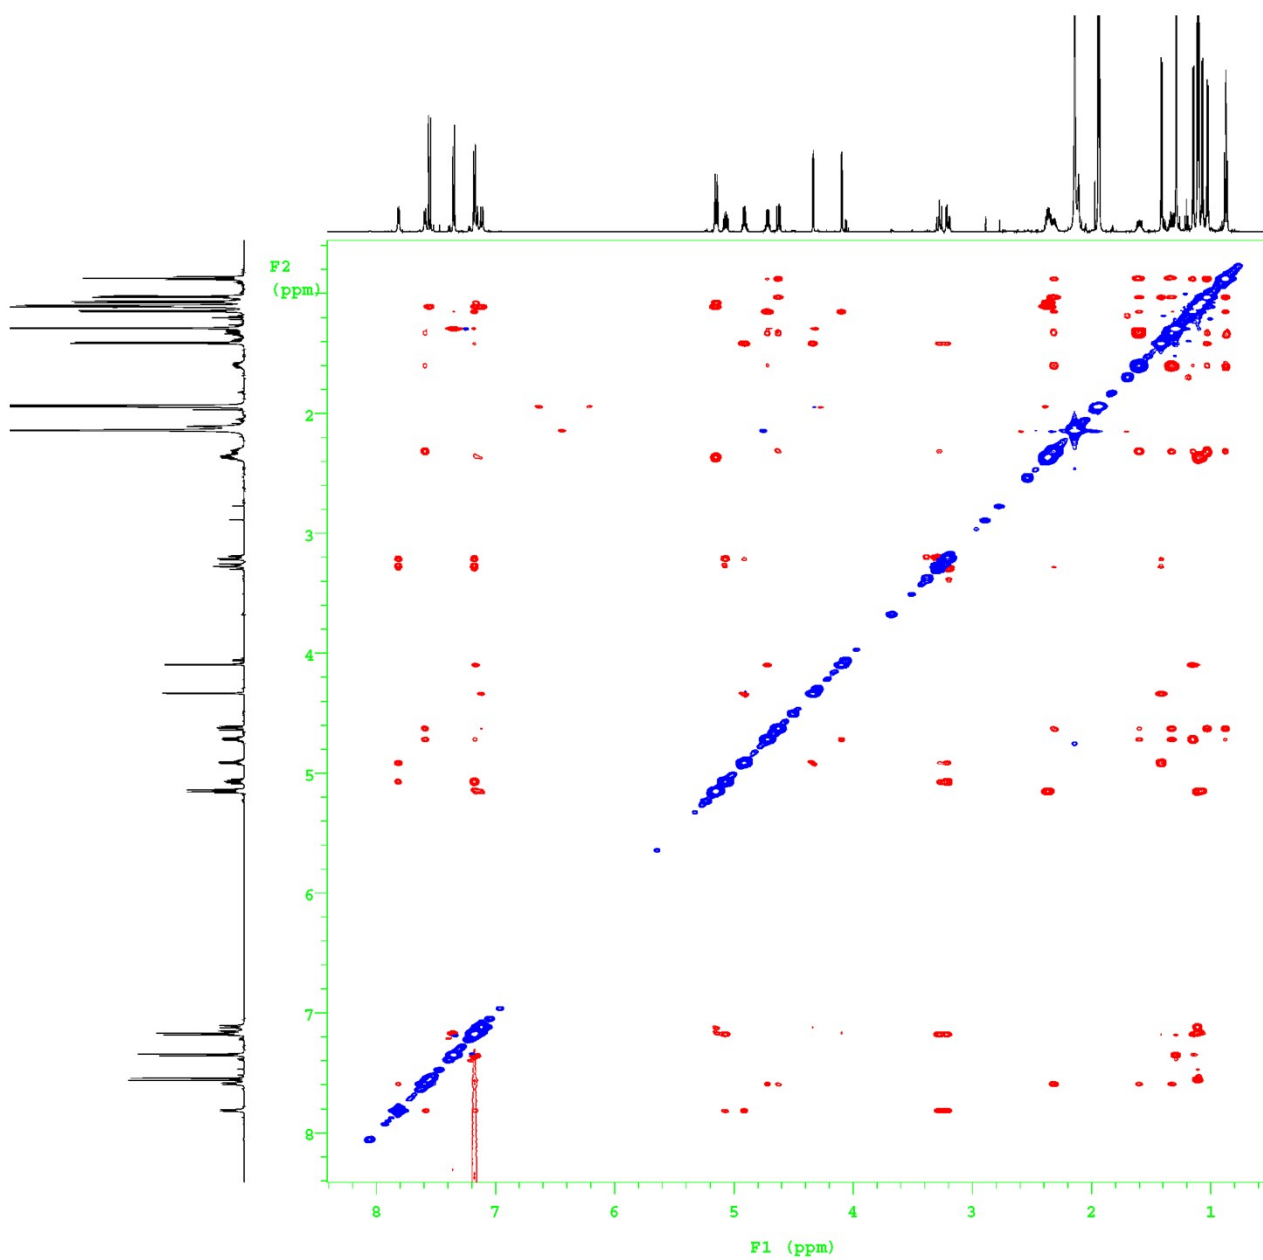

**Fig. S9** 2D  $^1\text{H}$ - $^1\text{H}$  ROESY spectrum of peptide **3** in  $\text{CD}_3\text{CN}$  at 298 K.

# <sup>1</sup>H NMR spectra of peptides 6

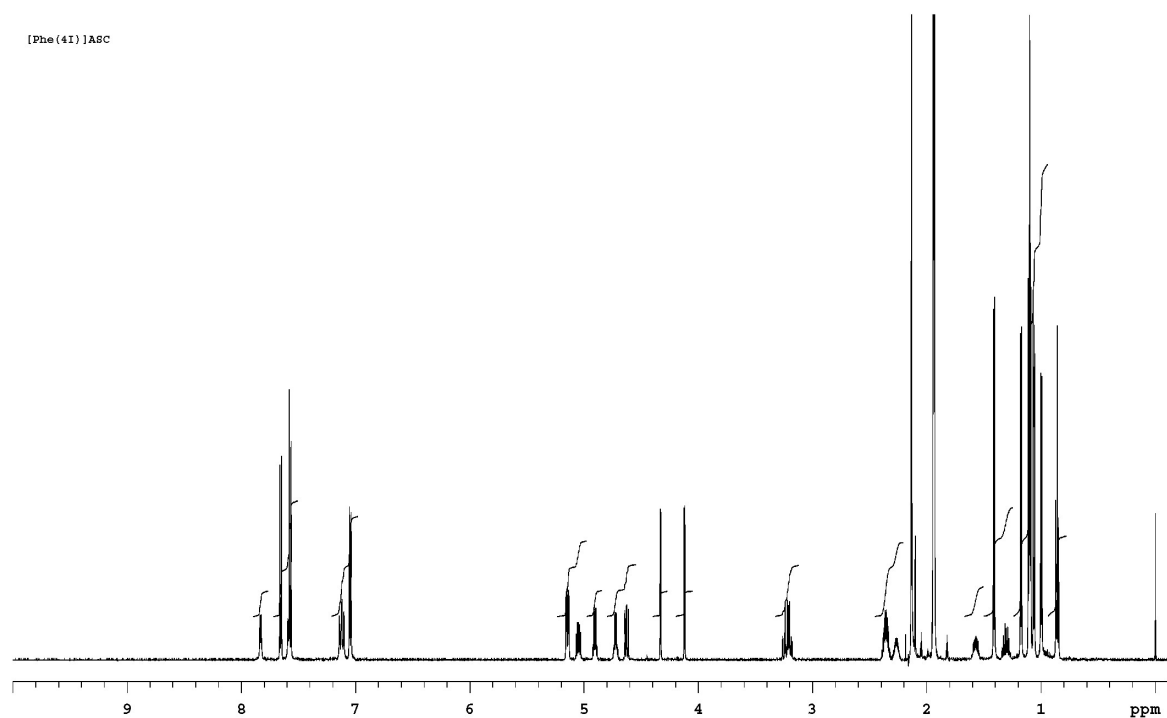

**Fig. S10** 1D <sup>1</sup>H NMR spectrum of peptide **6** in CD<sub>3</sub>CN at 298 K.

| Residue              | $\delta$ HN (ppm)<br><sup>3</sup> J (Hz) | $\delta$ H $\alpha$ (ppm)<br><sup>3</sup> J (Hz) | $\delta$ H $\beta$ (ppm)<br><sup>3</sup> J (Hz)                              | $\delta$ H $\gamma$ (ppm)<br><sup>3</sup> J (Hz)                                        | $\delta$ H $\delta$ (ppm)<br><sup>3</sup> J (Hz) | $\delta$ Other protons (ppm)<br><sup>3</sup> J (Hz) |
|----------------------|------------------------------------------|--------------------------------------------------|------------------------------------------------------------------------------|-----------------------------------------------------------------------------------------|--------------------------------------------------|-----------------------------------------------------|
| Phe(4I) <sup>1</sup> | 7.83<br>d, J = 7.2                       | 5.05<br>ddd, J = 11.4, 7.2, 6.6                  | $\gamma$ CH <sub>2</sub> 3.24, 3.20<br>dd, J = 13.5, 11.4, dd, J = 13.5, 6.6 |                                                                                         | 7.05<br>d, J = 8.4                               | $\epsilon$ H 7.66<br>d, J = 8.4                     |
| Oxz <sup>2</sup>     |                                          | 4.12<br>d, J = 3.6                               | 4.73<br>qd, J = 6.6, 3.6                                                     | 1.18<br>d, J = 6.6                                                                      |                                                  |                                                     |
| D-Val <sup>3</sup>   | 7.13<br>d, J = 10.8                      | 5.14<br>dd, J = 10.8, 4.2                        | 2.35<br>hept. d, J = 6.6, 4.2                                                | $\gamma$ CH <sub>3</sub> 1.10, $\gamma'$ CH <sub>3</sub> 1.06<br>d, J = 6.6, d, J = 6.6 |                                                  |                                                     |
| Thz <sup>4or8</sup>  |                                          |                                                  |                                                                              |                                                                                         |                                                  | 7.57<br>s                                           |
| Ile <sup>5</sup>     | 7.59<br>d, J = 7.2                       | 4.63<br>dd, J = 10.2, 7.2                        | 2.27<br>m                                                                    | $\gamma$ CH <sub>2</sub> 1.58, 1.31<br>m, m                                             | $\gamma$ CH <sub>3</sub> 1.00<br>d, J = 7.2      | 0.86<br>t, J = 7.8                                  |
| Oxz <sup>6</sup>     |                                          | 4.33<br>d, J = 3.6                               | 4.91<br>qd, J = 6.6, 3.6                                                     | 1.41<br>d, J = 6.6                                                                      |                                                  |                                                     |
| D-Val <sup>7</sup>   | 7.11<br>d, J = 10.8                      | 5.15<br>dd, J = 10.8, 4.2                        | 2.37<br>hept. d, J = 6.6, 4.2                                                | $\gamma$ CH <sub>3</sub> 1.11, $\gamma'$ CH <sub>3</sub> 1.10<br>d, J = 6.6, d, J = 6.6 |                                                  |                                                     |
| Thz <sup>4or8</sup>  |                                          |                                                  |                                                                              |                                                                                         |                                                  | 7.58<br>s                                           |

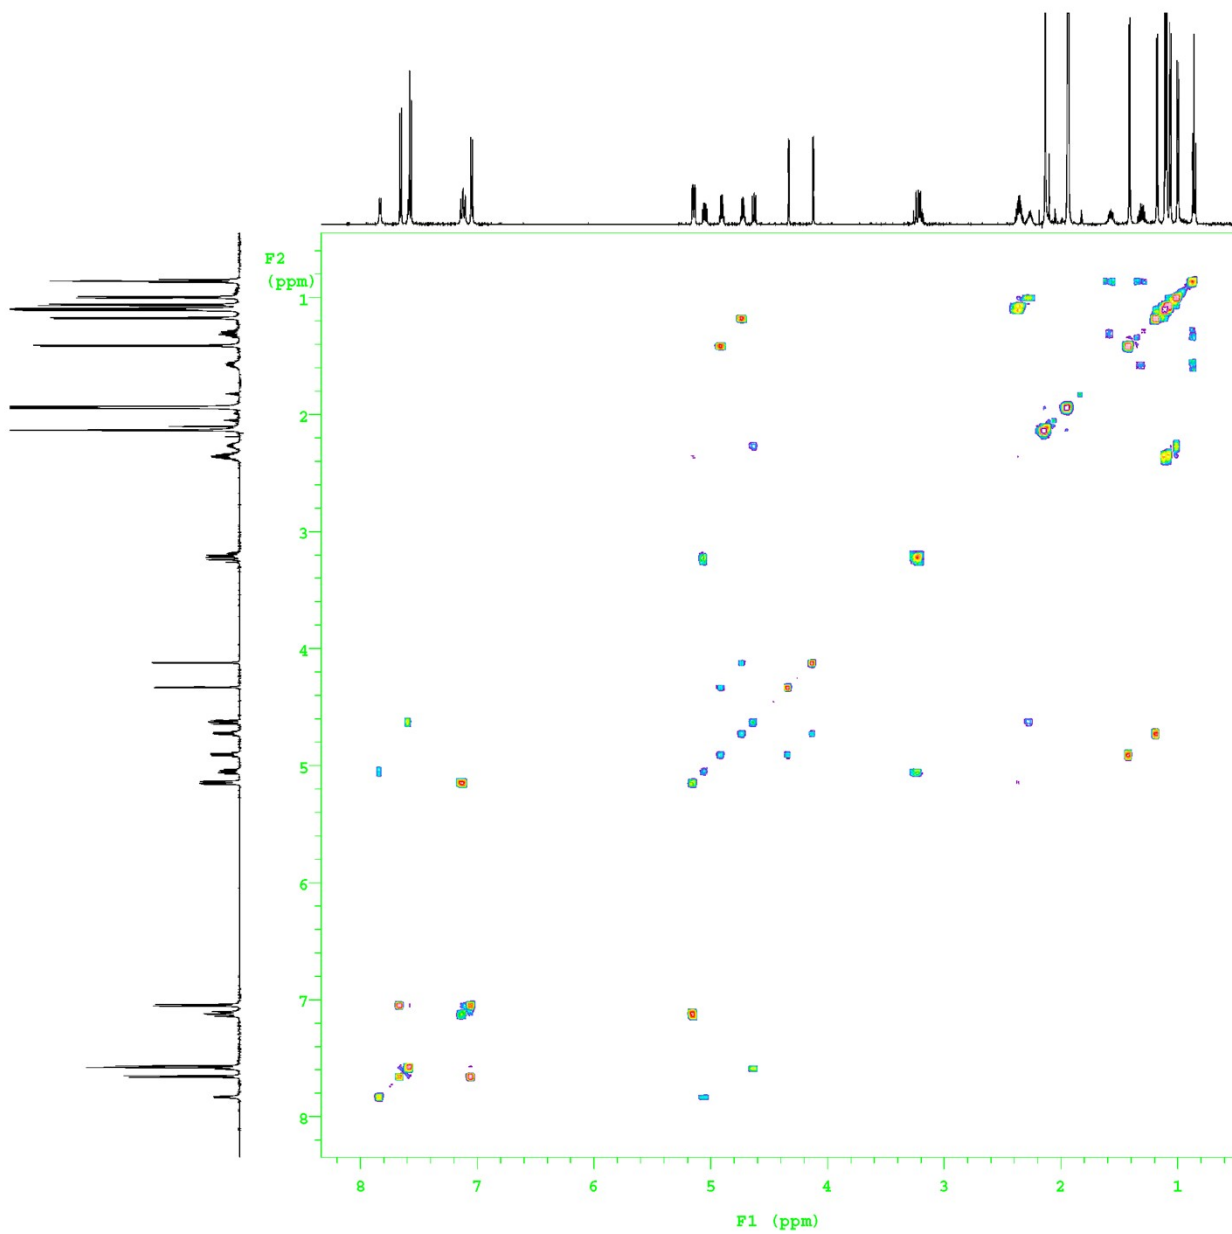

**Fig. S11** 2D  $^1\text{H}$ - $^1\text{H}$  COSY spectrum of peptide **6** in  $\text{CD}_3\text{CN}$  at 298 K.



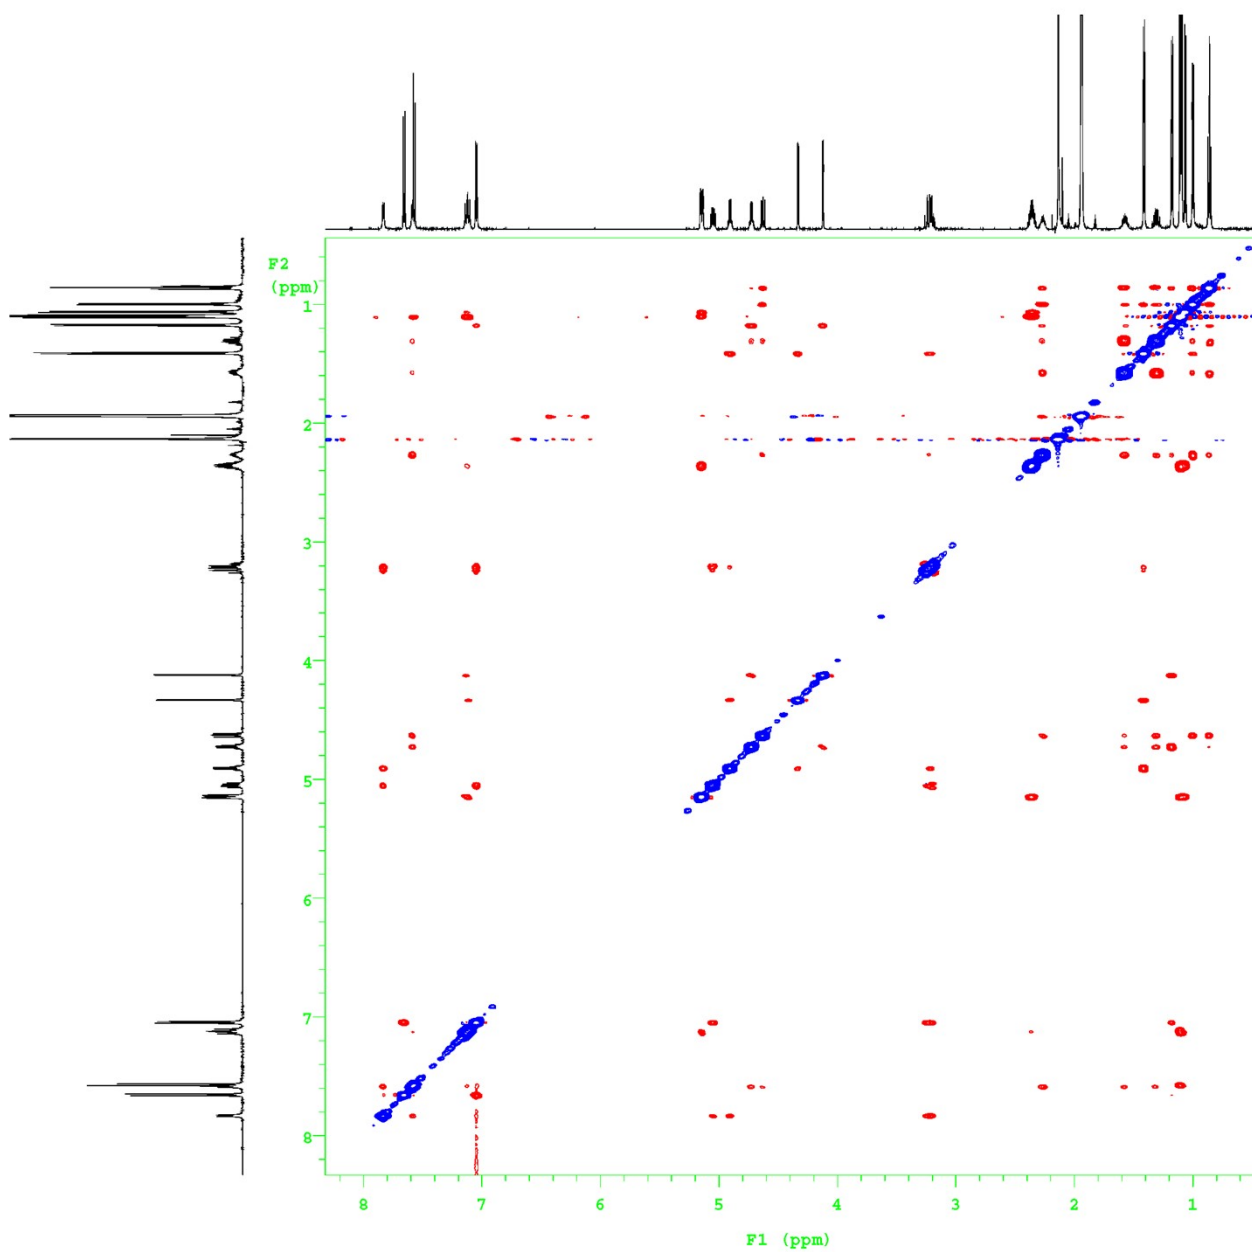

**Fig. S12** 2D  $^1\text{H}$ - $^1\text{H}$  ROESY spectrum of peptide 6 in  $\text{CD}_3\text{CN}$  at 298 K.

# <sup>1</sup>H NMR spectra of peptides 7

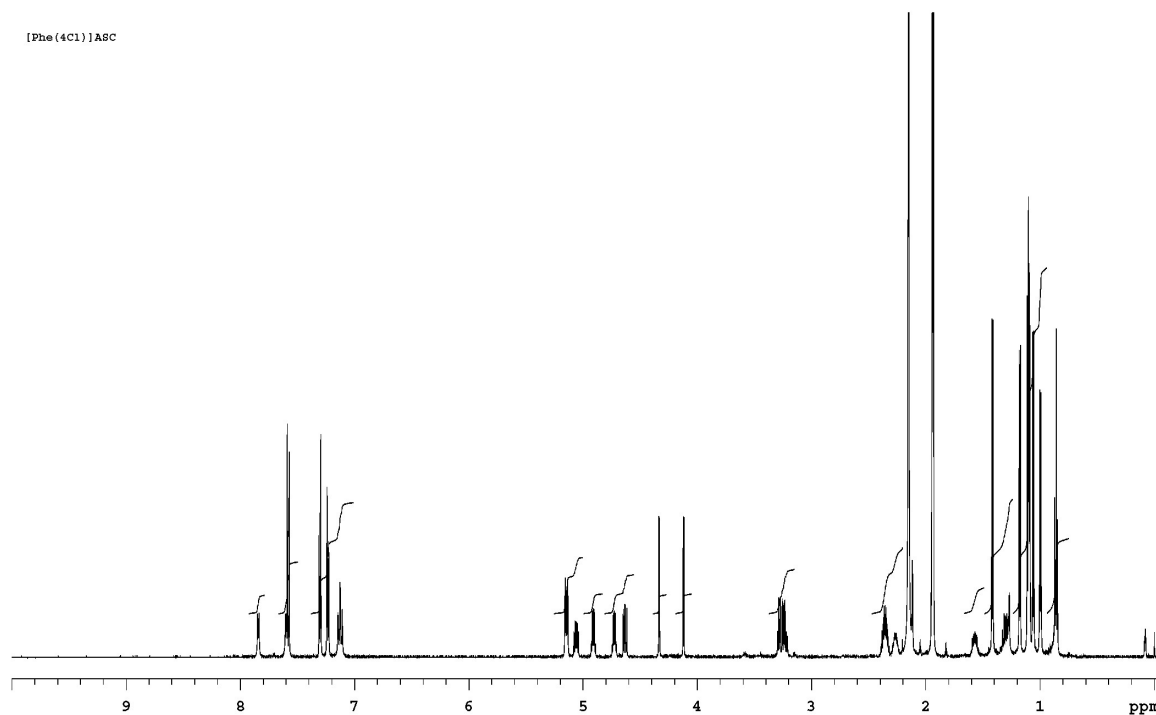

Fig. S13 1D <sup>1</sup>H NMR spectrum of peptide 7 in CD<sub>3</sub>CN at 298 K.

| Residue               | $\delta$ HN (ppm)<br><sup>3</sup> J (Hz) | $\delta$ H $\alpha$ (ppm)<br><sup>3</sup> J (Hz) | $\delta$ H $\beta$ (ppm)<br><sup>3</sup> J (Hz)                              | $\delta$ H $\gamma$ (ppm)<br><sup>3</sup> J (Hz)                                        | $\delta$ H $\delta$ (ppm)<br><sup>3</sup> J (Hz) | $\delta$ Other protons (ppm)<br><sup>3</sup> J (Hz) |
|-----------------------|------------------------------------------|--------------------------------------------------|------------------------------------------------------------------------------|-----------------------------------------------------------------------------------------|--------------------------------------------------|-----------------------------------------------------|
| Phe(4Cl) <sup>1</sup> | 7.84<br>d, J = 6.6                       | 5.06<br>ddd, J = 10.8, 6.6, 6.0                  | $\gamma$ CH <sub>2</sub> 3.28, 3.23<br>dd, J = 13.2, 10.8, dd, J = 13.2, 6.0 |                                                                                         | 7.24<br>d, J = 8.4                               | $\epsilon$ H 7.30<br>d, J = 8.4                     |
| Oxz <sup>2</sup>      |                                          | 4.12<br>d, J = 3.6                               | 4.73<br>qd, J = 6.6, 3.6                                                     | 1.18<br>d, J = 6.6                                                                      |                                                  |                                                     |
| D-Val <sup>3</sup>    | 7.14<br>d, J = 10.2                      | 5.14<br>dd, J = 10.2, 4.2                        | 2.35<br>hept. d, J = 6.6, 4.2                                                | $\gamma$ CH <sub>3</sub> 1.10, $\gamma'$ CH <sub>3</sub> 1.06<br>d, J = 6.6, d, J = 6.6 |                                                  |                                                     |
| Thz <sup>4or8</sup>   |                                          |                                                  |                                                                              |                                                                                         |                                                  | 7.57<br>s                                           |
| Ile <sup>5</sup>      | 7.60<br>d, J = 9.6                       | 4.63<br>dd, J = 9.6, 7.8                         | 2.27<br>m                                                                    | $\gamma$ CH <sub>2</sub> 1.57, 1.31<br>m, m                                             | $\gamma$ CH <sub>3</sub> 1.00<br>d, J = 7.2      | 0.86<br>t, J = 7.8                                  |
| Oxz <sup>6</sup>      |                                          | 4.34<br>d, J = 3.6                               | 4.91<br>qd, J = 6.0, 3.6                                                     | 1.42<br>d, J = 6.0                                                                      |                                                  |                                                     |
| D-Va <sup>7</sup>     | 7.12<br>d, J = 10.2                      | 5.15<br>dd, J = 10.2, 4.2                        | 2.37<br>hept. d, J = 6.6, 4.2                                                | $\gamma$ CH <sub>3</sub> 1.11, $\gamma'$ CH <sub>3</sub> 1.09<br>d, J = 6.6, d, J = 6.6 |                                                  |                                                     |
| Thz <sup>4or8</sup>   |                                          |                                                  |                                                                              |                                                                                         |                                                  | 7.59<br>s                                           |

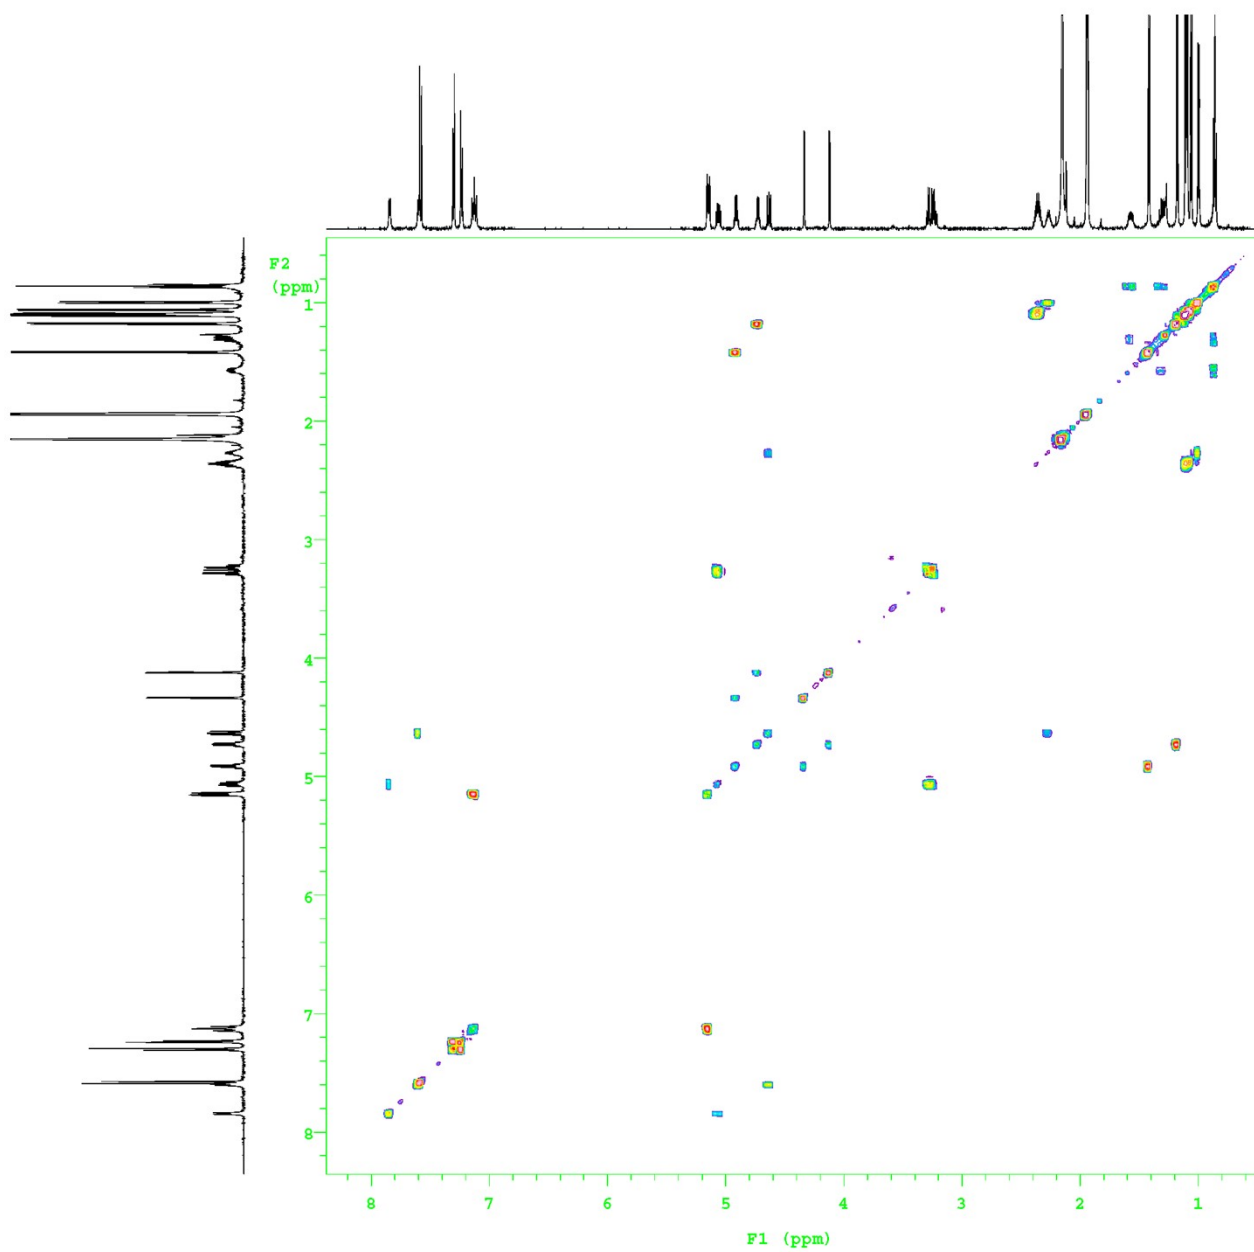

**Fig. S14** 2D  $^1\text{H}$ - $^1\text{H}$  COSY spectrum of peptide **7** in  $\text{CD}_3\text{CN}$  at 298 K.

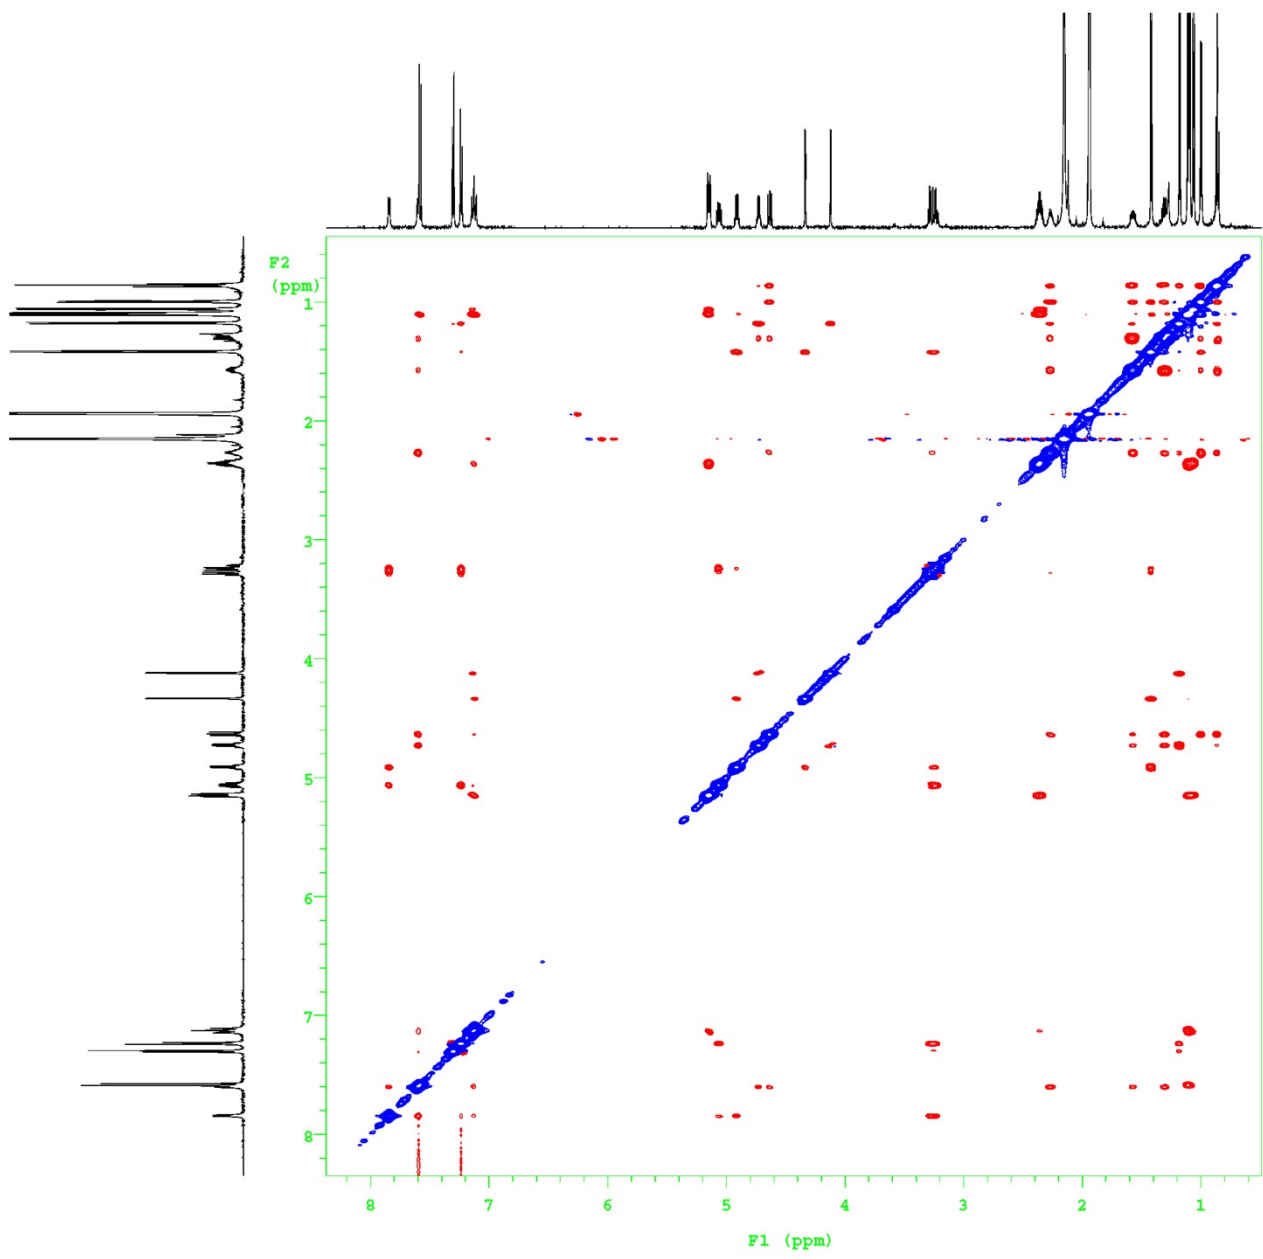

**Fig. S15** 2D  $^1\text{H}$ - $^1\text{H}$  ROESY spectrum of peptide **7** in  $\text{CD}_3\text{CN}$  at 298 K.

# <sup>1</sup>H NMR spectra of peptides 8

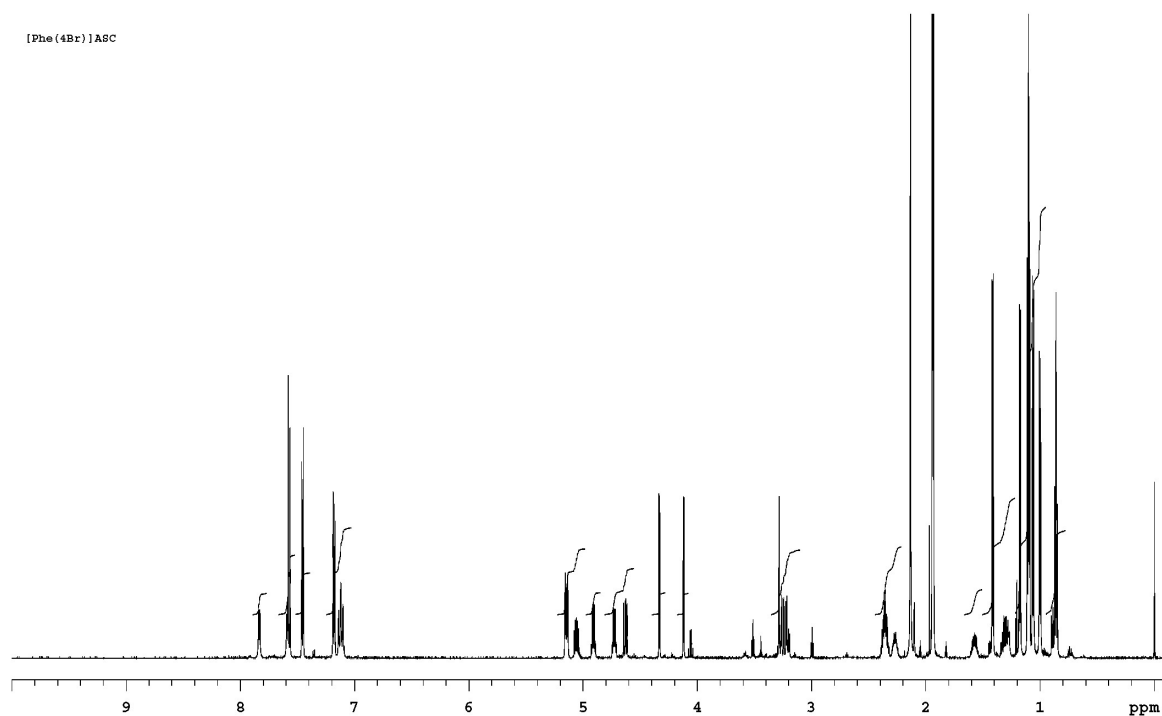

Fig. S16 1D <sup>1</sup>H NMR spectrum of peptide **8** in CD<sub>3</sub>CN at 298 K.

| Residue               | δ HN (ppm)<br><sup>3</sup> J (Hz) | δ H <sub>α</sub> (ppm)<br><sup>3</sup> J (Hz) | δ H <sub>β</sub> (ppm)<br><sup>3</sup> J (Hz)                        | δ H <sub>γ</sub> (ppm)<br><sup>3</sup> J (Hz)                           | δ H <sub>δ</sub> (ppm)<br><sup>3</sup> J (Hz) | δ Other protons (ppm)<br><sup>3</sup> J (Hz) |
|-----------------------|-----------------------------------|-----------------------------------------------|----------------------------------------------------------------------|-------------------------------------------------------------------------|-----------------------------------------------|----------------------------------------------|
| Phe(4Br) <sup>1</sup> | 7.84<br>d, J = 7.2                | 5.06<br>ddd, J = 11.4, 7.2, 5.4               | γCH <sub>2</sub> 3.21, 3.26<br>dd, J = 13.2, 11.4, dd, J = 13.2, 5.4 |                                                                         | 7.18<br>d, J = 8.4                            | εH 7.46<br>d, J = 8.4                        |
| Oxz <sup>2</sup>      |                                   | 4.12<br>d, J = 3.6                            | 4.73<br>qd, J = 6.0, 3.6                                             | 1.18<br>d, J = 6.0                                                      |                                               |                                              |
| D-Val <sup>3</sup>    | 7.13<br>d, J = 10.2               | 5.14<br>dd, J = 10.2, 3.6                     | 2.35<br>hept. d, J = 6.6, 3.6                                        | γCH <sub>3</sub> 1.10, γ'CH <sub>3</sub> 1.06<br>d, J = 6.6, d, J = 6.6 |                                               |                                              |
| Thz <sup>4or8</sup>   |                                   |                                               |                                                                      |                                                                         |                                               | 7.57<br>s                                    |
| Ile <sup>5</sup>      | 7.59<br>d, J = 7.2                | 4.63<br>dd, J = 10.2, 7.2                     | 2.27<br>m                                                            | γCH <sub>2</sub> 1.58, 1.31<br>m, m                                     | γCH <sub>3</sub> 1.00<br>d, J = 7.2           | 0.86<br>t, J = 7.8                           |
| Oxz <sup>6</sup>      |                                   | 4.33<br>d, J = 3.6                            | 4.91<br>qd, J = 6.0, 3.6                                             | 1.42<br>d, J = 6.0                                                      |                                               |                                              |
| D-Va <sup>7</sup>     | 7.11<br>d, J = 10.2               | 5.15<br>dd, J = 10.2, 3.6                     | 2.37<br>hept. d, J = 7.2, 3.6                                        | γCH <sub>3</sub> 1.11, γ'CH <sub>3</sub> 1.10<br>d, J = 7.2, d, J = 7.2 |                                               |                                              |
| Thz <sup>4or8</sup>   |                                   |                                               |                                                                      |                                                                         |                                               | 7.58<br>s                                    |

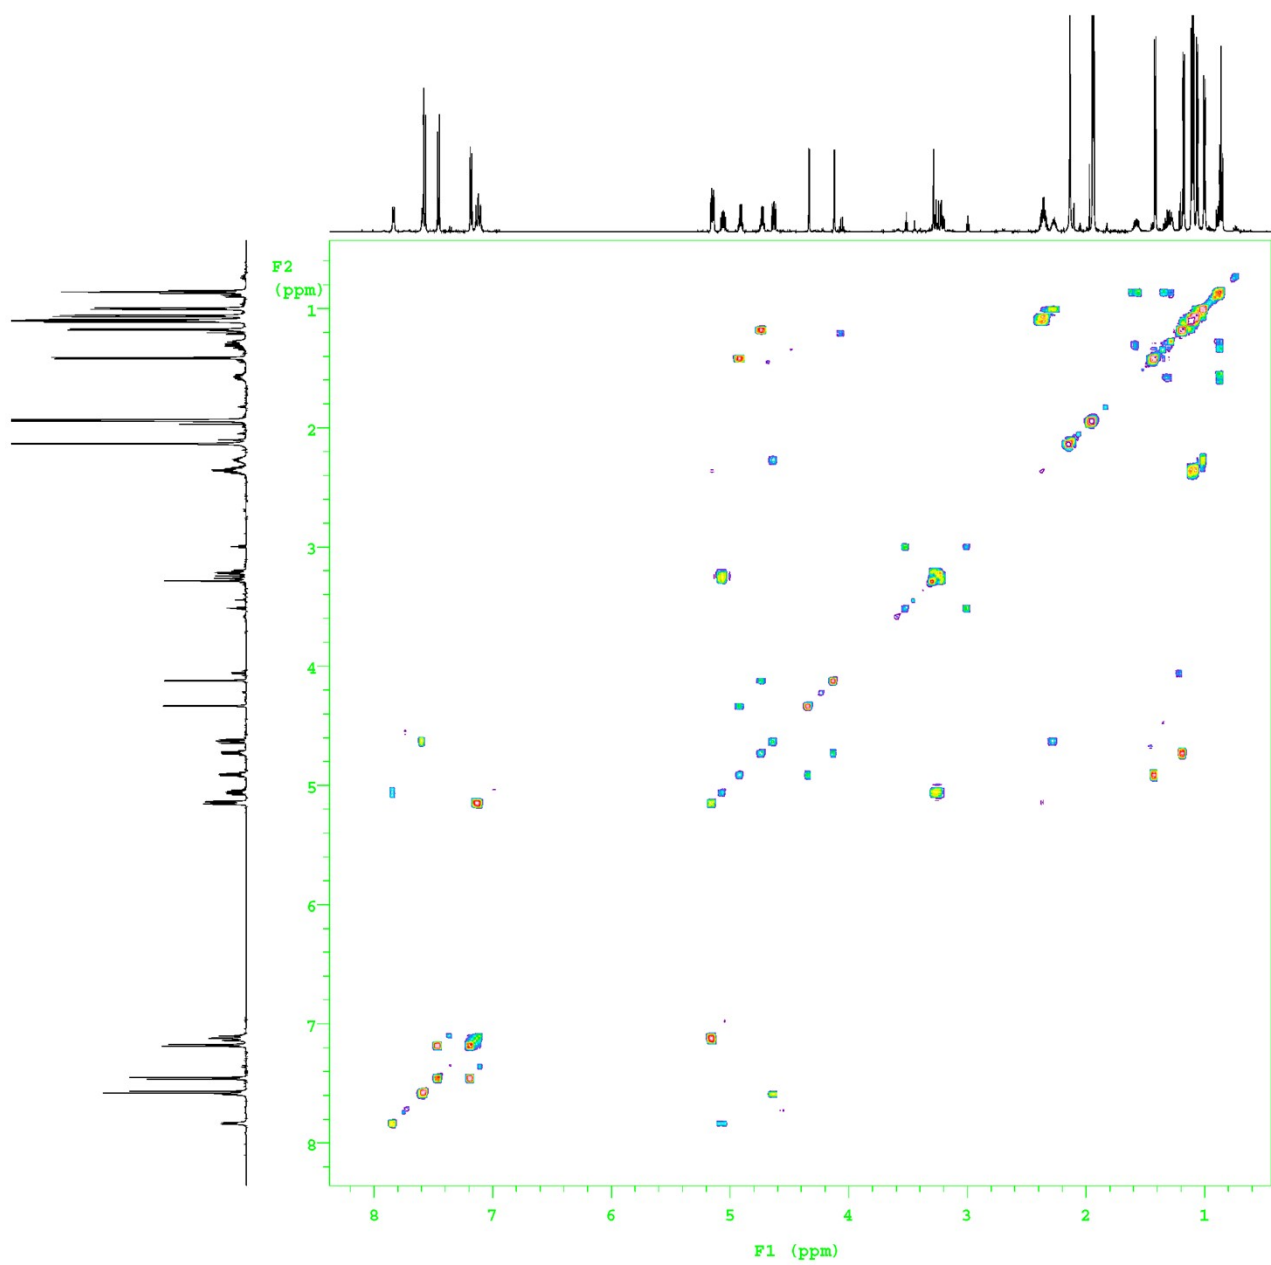

**Fig. S17** 2D  $^1\text{H}$ - $^1\text{H}$  COSY spectrum of peptide **8** in  $\text{CD}_3\text{CN}$  at 298 K.

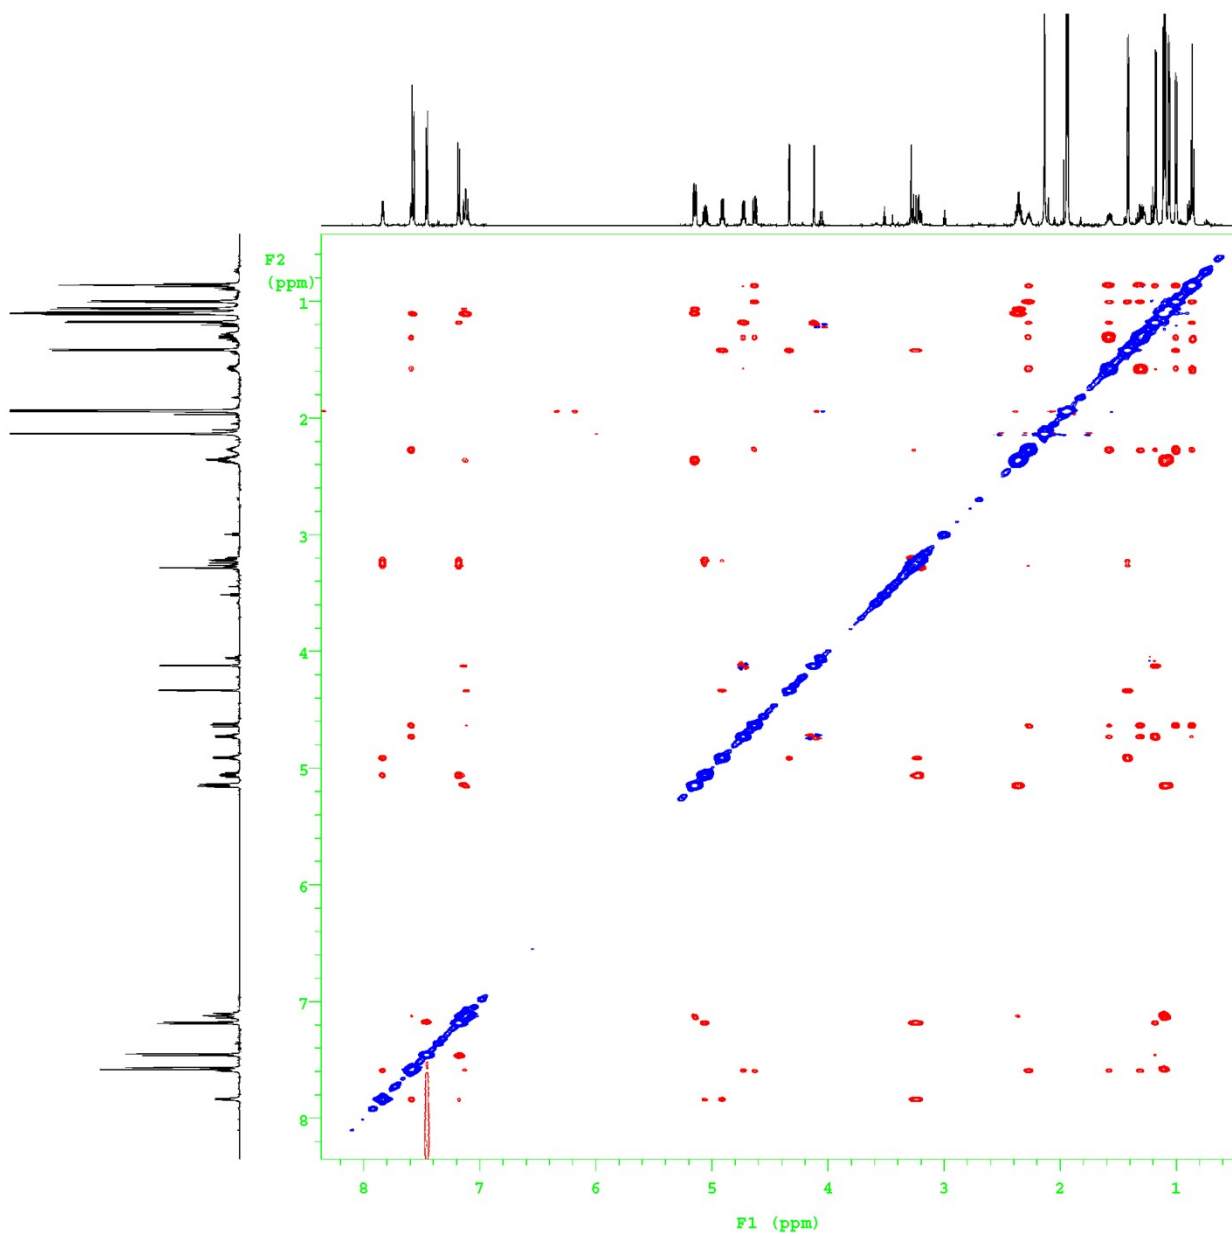

**Fig. S18** 2D  $^1\text{H}$ - $^1\text{H}$  ROESY spectrum of peptide **8** in  $\text{CD}_3\text{CN}$  at 298 K.

# <sup>1</sup>H NMR spectra of peptides 9

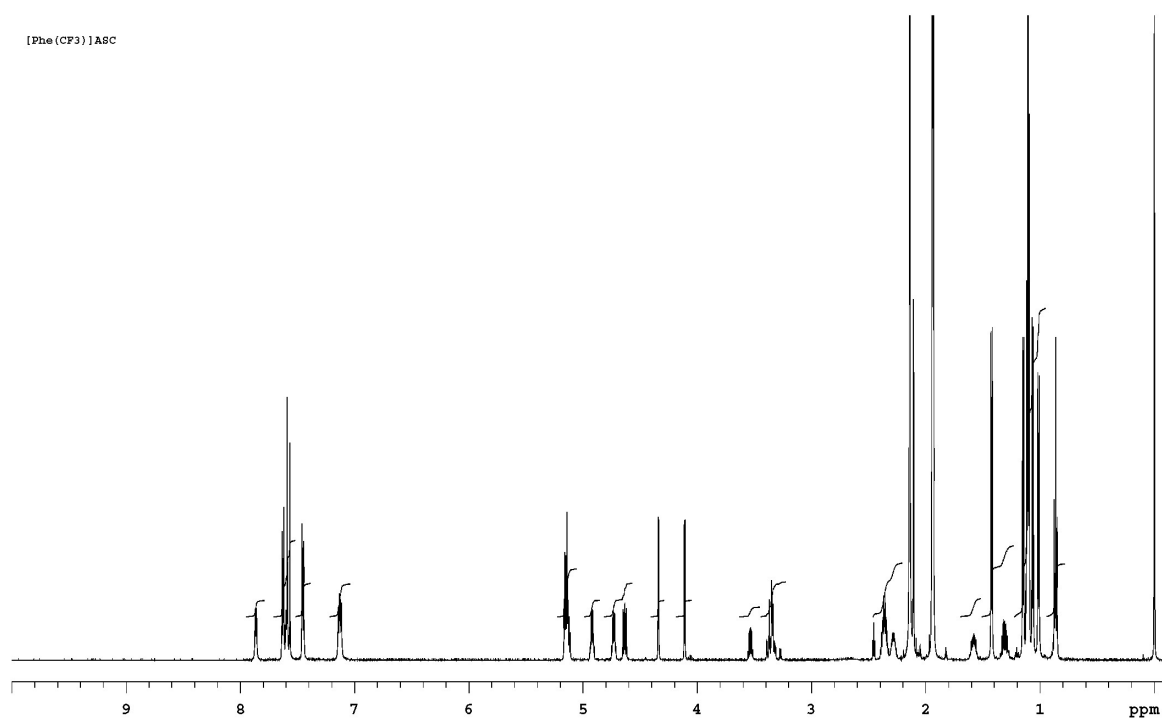

Fig. S19 1D <sup>1</sup>H NMR spectrum of peptide 9 in CD<sub>3</sub>CN at 298 K.

| Residue               | δ HN (ppm)<br><sup>3</sup> J (Hz) | δ Hα (ppm)<br><sup>3</sup> J (Hz) | δ Hβ (ppm)<br><sup>3</sup> J (Hz)                                    | δ Hγ (ppm)<br><sup>3</sup> J (Hz)                                       | δ Hδ (ppm)<br><sup>3</sup> J (Hz)   | δ Other protons (ppm)<br><sup>3</sup> J (Hz) |
|-----------------------|-----------------------------------|-----------------------------------|----------------------------------------------------------------------|-------------------------------------------------------------------------|-------------------------------------|----------------------------------------------|
| Phe(CF3) <sup>1</sup> | 7.87<br>d, J = 6.6                | 5.13<br>dt, J = 10.8, 6.6         | γCH <sub>2</sub> 3.37, 3.33<br>dd, J = 13.2, 10.8, dd, J = 13.2, 6.6 |                                                                         | 7.45<br>d, J = 8.4                  | εH 7.63<br>d, J = 8.4                        |
| Oxz <sup>2</sup>      |                                   | 4.11<br>d, J = 3.6                | 4.73<br>qd, J = 6.0, 3.6                                             | 1.15<br>d, J = 6.0                                                      |                                     |                                              |
| D-Val <sup>3</sup>    | 7.14<br>d, J = 10.2               | 5.15<br>dd, J = 10.2, 4.8         | 2.36<br>m                                                            | γCH <sub>3</sub> 1.11, γ'CH <sub>3</sub> 1.07<br>d, J = 6.6, d, J = 6.6 |                                     |                                              |
| Thz <sup>4or8</sup>   |                                   |                                   |                                                                      |                                                                         |                                     | 7.57<br>s                                    |
| Ile <sup>5</sup>      | 7.60<br>d, J = 7.8                | 4.64<br>dd, J = 10.8, 7.8         | 2.29<br>m                                                            | γCH <sub>2</sub> 1.58, 1.31<br>m, m                                     | γCH <sub>3</sub> 1.01<br>d, J = 6.6 | 0.86<br>t, J = 7.8                           |
| Oxz <sup>6</sup>      |                                   | 4.34<br>d, J = 4.2                | 4.92<br>qd, J = 6.0, 4.2                                             | 1.43<br>d, J = 6.0                                                      |                                     |                                              |
| D-Va <sup>7</sup>     | 7.12<br>d, J = 10.2               | 5.16<br>dd, J = 10.2, 4.8         | 2.37<br>m                                                            | γCH <sub>3</sub> 1.11, γ'CH <sub>3</sub> 1.10<br>d, J = 6.6, d, J = 6.6 |                                     |                                              |
| Thz <sup>4or8</sup>   |                                   |                                   |                                                                      |                                                                         |                                     | 7.59<br>s                                    |



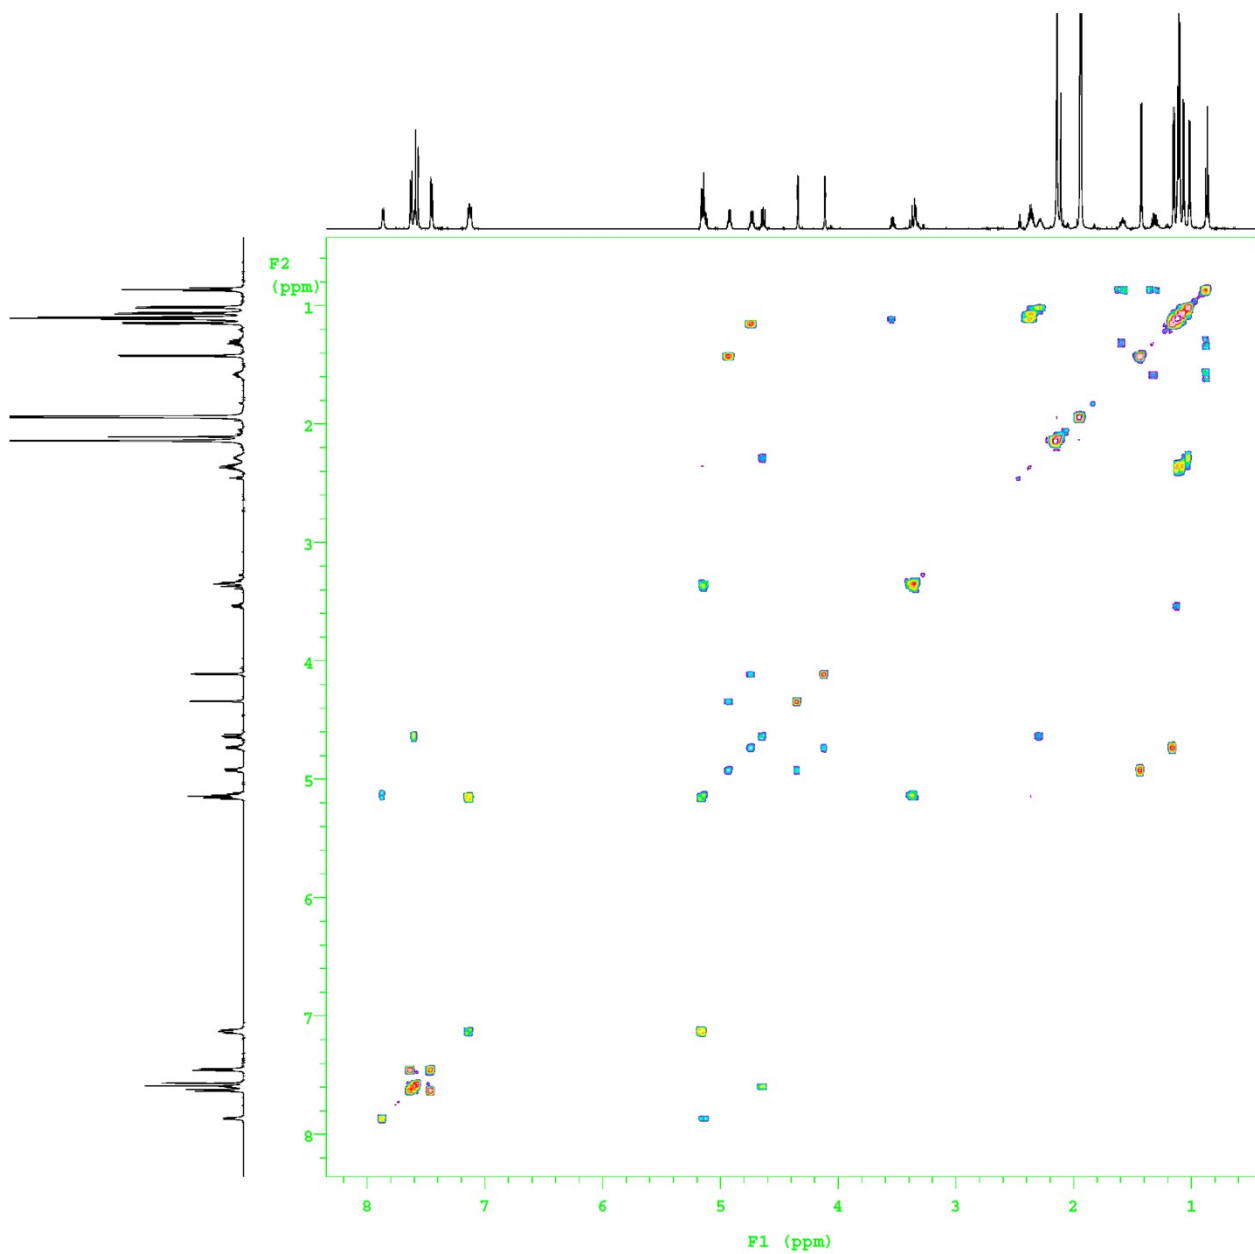

**Fig. S20** 2D  $^1\text{H}$ - $^1\text{H}$  COSY spectrum of peptide **9** in  $\text{CD}_3\text{CN}$  at 298 K.

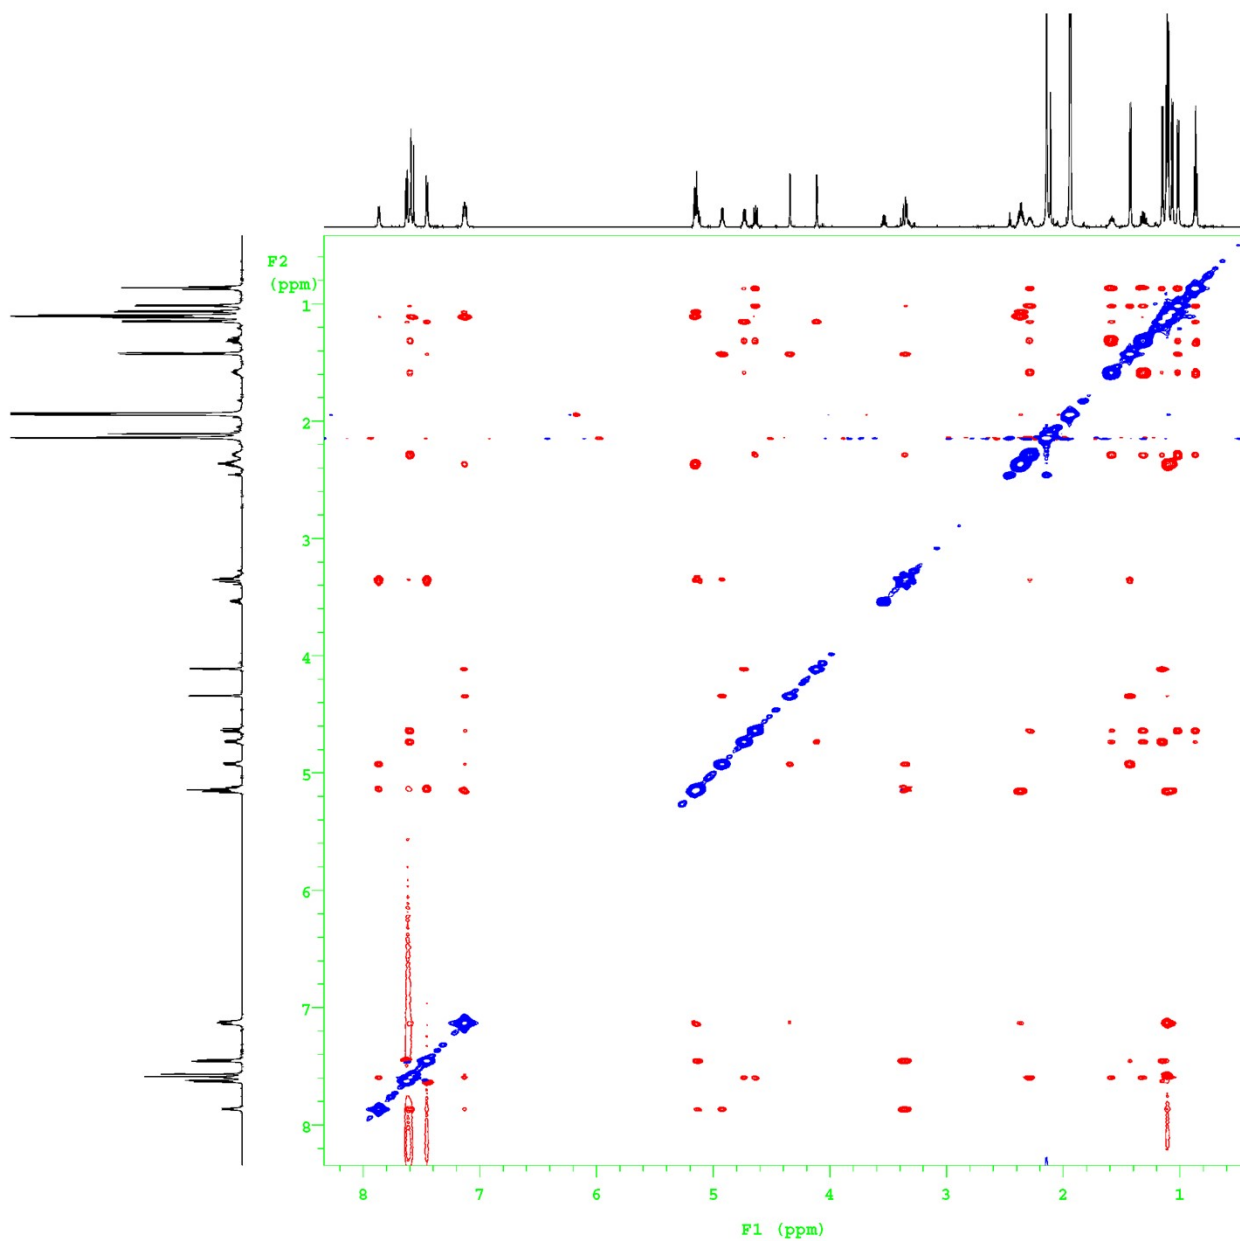

**Fig. S21** 2D  $^1\text{H}$ - $^1\text{H}$  ROESY spectrum of peptide **9** in  $\text{CD}_3\text{CN}$  at 298 K.

# <sup>1</sup>H NMR spectra of peptides 10

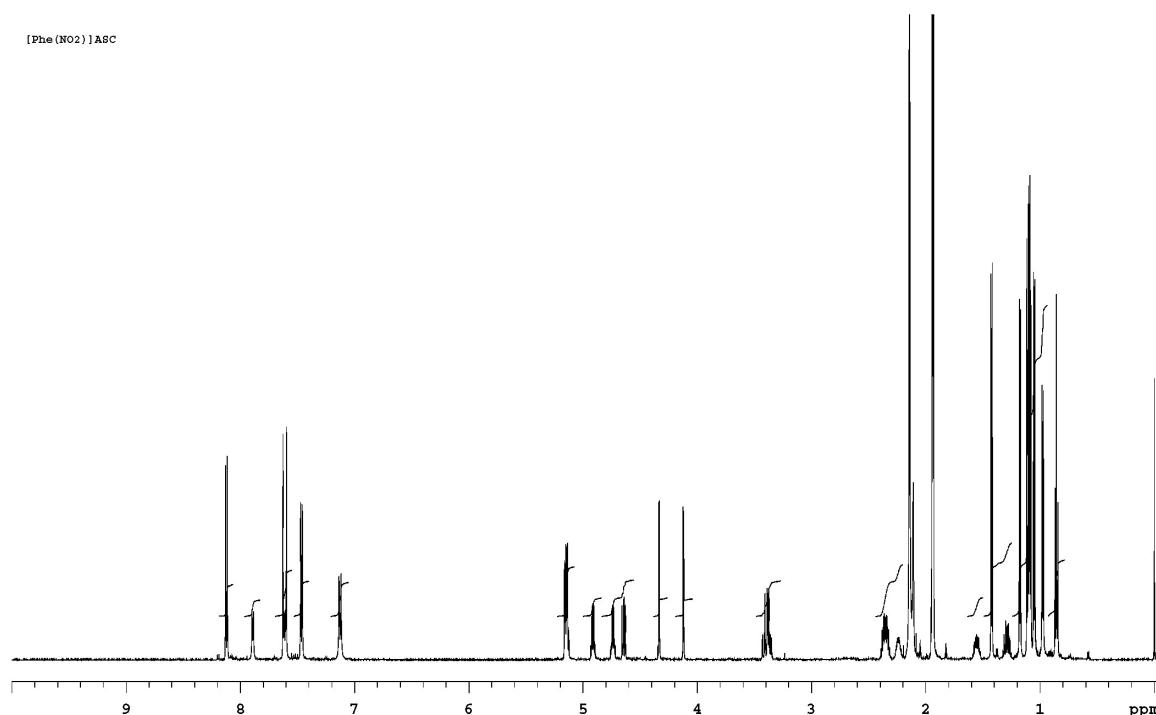

**Fig. S22** 1D <sup>1</sup>H NMR spectrum of peptide **10** in CD<sub>3</sub>CN at 298 K.

| Residue               | δ HN (ppm)<br><sup>3</sup> J (Hz) | δ Hα (ppm)<br><sup>3</sup> J (Hz) | δ Hβ (ppm)<br><sup>3</sup> J (Hz)                                    | δ Hγ (ppm)<br><sup>3</sup> J (Hz)                                       | δ Hδ (ppm)<br><sup>3</sup> J (Hz)   | δ Other protons (ppm)<br><sup>3</sup> J (Hz) |
|-----------------------|-----------------------------------|-----------------------------------|----------------------------------------------------------------------|-------------------------------------------------------------------------|-------------------------------------|----------------------------------------------|
| Phe(NO2) <sup>1</sup> | 7.89<br>d, J = 6.6                | 5.15<br>m                         | γCH <sub>2</sub> 3.41, 3.37<br>dd, J = 13.5, 10.8, dd, J = 13.5, 6.6 |                                                                         | 7.47<br>d, J = 8.4                  | εH 8.12<br>d, J = 8.4                        |
| Oxz <sup>2</sup>      |                                   | 4.12<br>d, J = 3.6                | 4.74<br>qd, J = 6.0, 3.6                                             | 1.18<br>d, J = 6.0                                                      |                                     |                                              |
| D-Val <sup>3or7</sup> | 7.13<br>d, J = 10.2               | 5.15<br>dd, J = 10.2, 6.6         | 2.36<br>m                                                            | γCH <sub>3</sub> 1.11, γ'CH <sub>3</sub> 1.09<br>d, J = 7.2, d, J = 7.2 |                                     |                                              |
| Thz <sup>4or8</sup>   |                                   |                                   |                                                                      |                                                                         |                                     | 7.60<br>s                                    |
| Ile <sup>5</sup>      | 7.61<br>d, J = 7.8                | 4.64<br>dd, J = 9.9, 7.8          | 2.24<br>m                                                            | γCH <sub>2</sub> 1.56, 1.29<br>m, m                                     | γCH <sub>3</sub> 0.98<br>d, J = 7.2 | 0.86<br>t, J = 7.8                           |
| Oxz <sup>6</sup>      |                                   | 4.34<br>d, J = 4.2                | 4.92<br>qd, J = 6.6, 4.2                                             | 1.43<br>d, J = 6.6                                                      |                                     |                                              |
| D-Va <sup>3or7</sup>  | 7.13<br>d, J = 10.2               | 5.15<br>dd, J = 10.2, 6.6         | 2.36<br>m                                                            | γCH <sub>3</sub> 1.10, γ'CH <sub>3</sub> 1.05<br>d, J = 6.6, d, J = 6.6 |                                     |                                              |
| Thz <sup>4or8</sup>   |                                   |                                   |                                                                      |                                                                         |                                     | 7.63<br>s                                    |

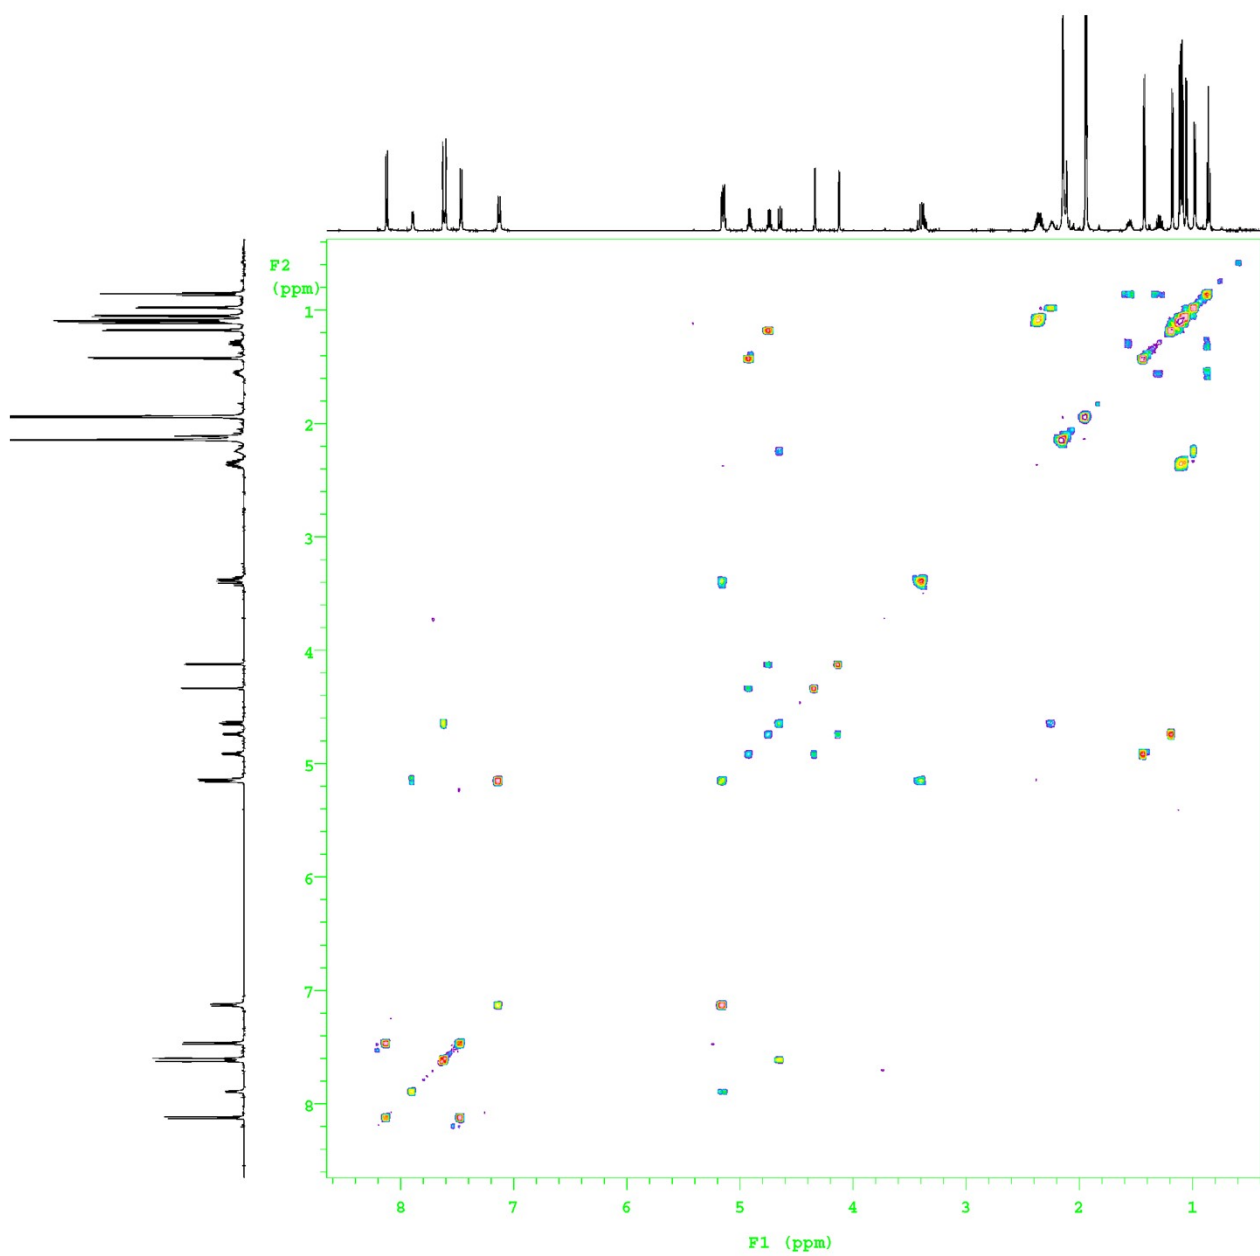

Fig. S23 2D  $^1\text{H}$ - $^1\text{H}$  COSY spectrum of peptide **10** in  $\text{CD}_3\text{CN}$  at 298 K.

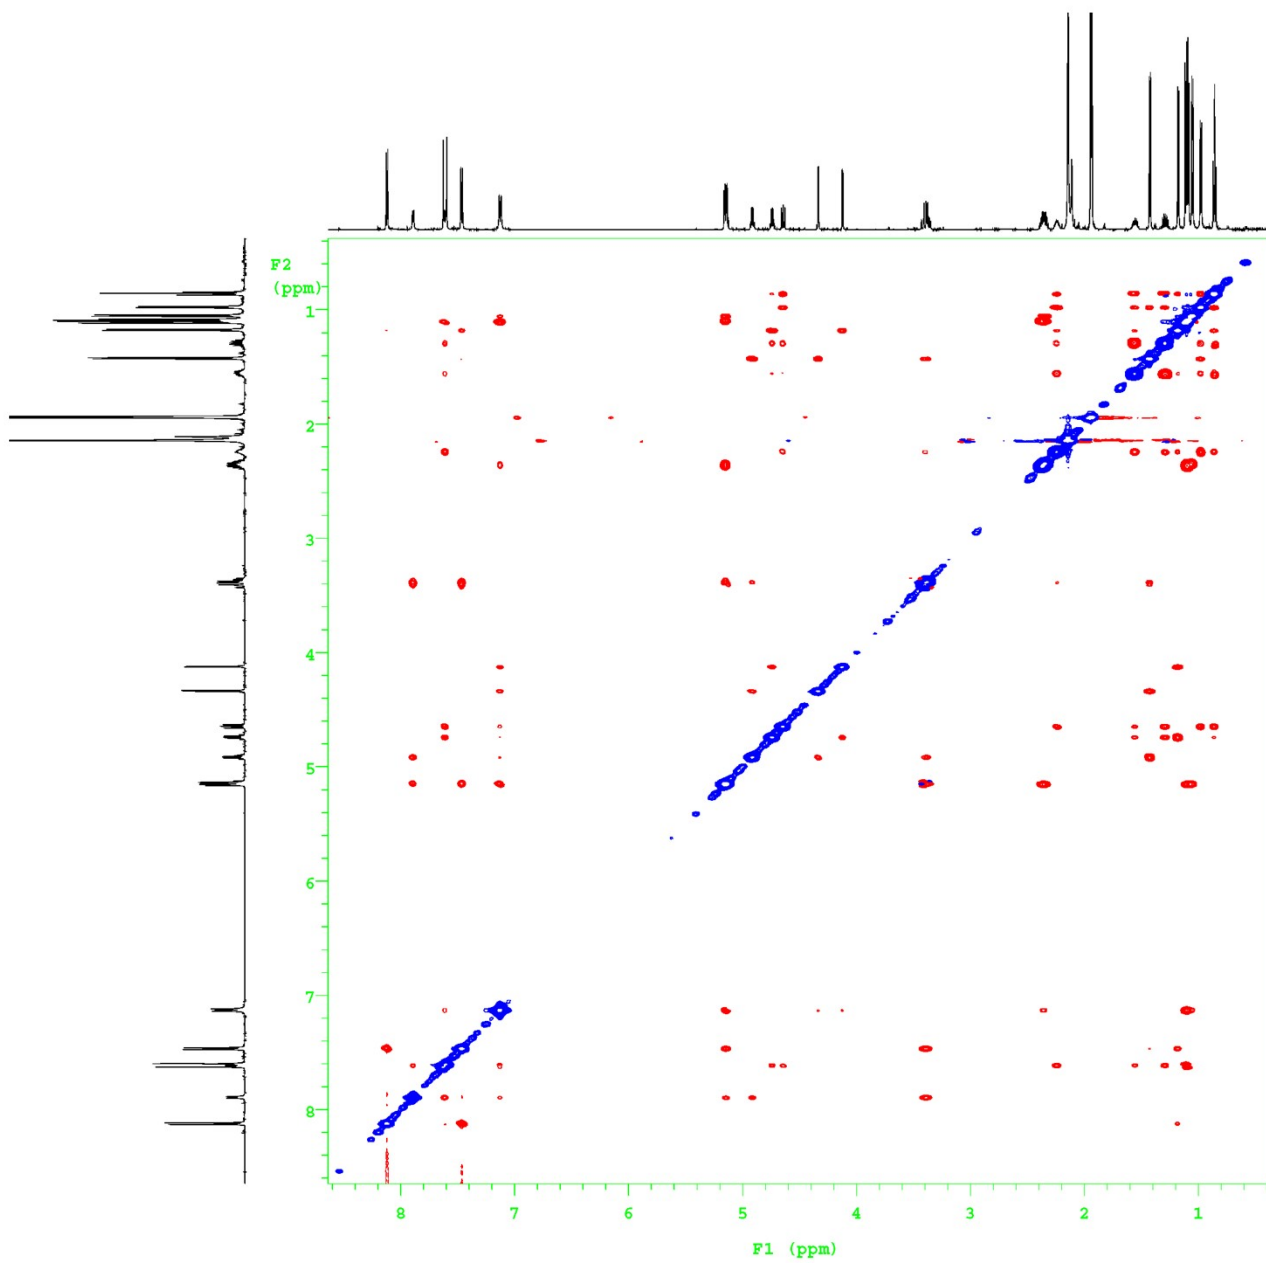

**Fig. S24** 2D  $^1\text{H}$ - $^1\text{H}$  ROESY spectrum of peptide **10** in  $\text{CD}_3\text{CN}$  at 298 K.

**Table S2.** Crystal and experimental data for **2**, **3** and **6**.

| Peptide                                                     | <b>2</b>                                                                                                          | <b>3</b>                                                                                                                            | <b>6</b>                                                                                                               |
|-------------------------------------------------------------|-------------------------------------------------------------------------------------------------------------------|-------------------------------------------------------------------------------------------------------------------------------------|------------------------------------------------------------------------------------------------------------------------|
| Formula                                                     | C <sub>40</sub> H <sub>52</sub> N <sub>8</sub> O <sub>6</sub> S <sub>2</sub> ,<br>C <sub>2</sub> H <sub>3</sub> N | C <sub>43</sub> H <sub>58</sub> N <sub>8</sub> O <sub>6</sub> S <sub>2</sub> ,<br>C <sub>2</sub> H <sub>3</sub> N, H <sub>2</sub> O | 2(C <sub>39</sub> H <sub>48</sub> IN <sub>8</sub> O <sub>6</sub> S <sub>2</sub> ),<br>C <sub>4</sub> H <sub>9</sub> NO |
| Formula Weight                                              | 846.07                                                                                                            | 906.16                                                                                                                              | 1919.88                                                                                                                |
| Cell System                                                 | orthorhombic                                                                                                      | triclinic                                                                                                                           | monoclinic                                                                                                             |
| Space Group                                                 | P2 <sub>1</sub> 2 <sub>1</sub> 2 <sub>1</sub>                                                                     | P1                                                                                                                                  | P2 <sub>1</sub>                                                                                                        |
| <i>a</i> , Å                                                | 15.6599(13)                                                                                                       | 9.38850(10)                                                                                                                         | 13.7742(6)                                                                                                             |
| <i>b</i> , Å                                                | 16.5029(14)                                                                                                       | 10.0778(2)                                                                                                                          | 21.7130(16)                                                                                                            |
| <i>c</i> , Å                                                | 17.2608(14)                                                                                                       | 13.0183(2)                                                                                                                          | 15.1389(6)                                                                                                             |
| $\alpha$ , deg                                              | 90.0                                                                                                              | 82.6590(10)                                                                                                                         | 90.0                                                                                                                   |
| $\beta$ , deg                                               | 90.0                                                                                                              | 86.0780(10)                                                                                                                         | 91.337(4)                                                                                                              |
| $\gamma$ , deg                                              | 90.0                                                                                                              | 80.1310(10)                                                                                                                         | 90.0                                                                                                                   |
| Volume, Å <sup>3</sup>                                      | 4460.8(6)                                                                                                         | 1202.20(3)                                                                                                                          | 4526.5(4)                                                                                                              |
| <i>Z</i>                                                    | 4                                                                                                                 | 1                                                                                                                                   | 2                                                                                                                      |
| <i>D<sub>c</sub></i> , g cm <sup>-3</sup>                   | 1.260                                                                                                             | 1.252                                                                                                                               | 1.409                                                                                                                  |
| <i>F</i> (000)                                              | 1800                                                                                                              | 484                                                                                                                                 | 1982                                                                                                                   |
| $\mu$ , mm <sup>-1</sup>                                    | 0.175 (Mo K $\alpha$ )                                                                                            | 1.473 (Cu K $\alpha$ )                                                                                                              | 6.876 (Cu K $\alpha$ )                                                                                                 |
| Wavelength, Å                                               | 0.71073                                                                                                           | 1.54184                                                                                                                             | 1.54184                                                                                                                |
| No. of reflections (obs)                                    | 36244                                                                                                             | 20933                                                                                                                               | 26294                                                                                                                  |
| <i>R</i> <sub>INT</sub>                                     | 0.0397                                                                                                            | 0.0307                                                                                                                              | 0.0779                                                                                                                 |
| $\theta_{\max}$ , deg                                       | 26.37                                                                                                             | 66.559                                                                                                                              | 68.251                                                                                                                 |
| No. of reflections<br>( <i>I</i> > 2 $\sigma$ ( <i>I</i> )) | 8537                                                                                                              | 7368                                                                                                                                | 9911                                                                                                                   |
| Flack parameter                                             | -0.02(9)                                                                                                          | 0.010(7)                                                                                                                            | 0.000(10)                                                                                                              |
| <i>R</i> 1                                                  | 0.0681                                                                                                            | 0.0462                                                                                                                              | 0.1093                                                                                                                 |
| <i>wR</i>                                                   | 0.1719                                                                                                            | 0.1315                                                                                                                              | 0.2930                                                                                                                 |
| Goodness of fit                                             | 1.096                                                                                                             | 1.047                                                                                                                               | 1.170                                                                                                                  |
| ( $\Delta/\sigma$ ) <sub>max</sub>                          | 0.002                                                                                                             | 0.008                                                                                                                               | 0.000                                                                                                                  |
| Fraction for $\theta_{\max}$                                | 1.000                                                                                                             | 0.996                                                                                                                               | 0.999                                                                                                                  |
| $\Delta\rho_{\max}$ , e Å <sup>-3</sup>                     | 0.532                                                                                                             | 0.860                                                                                                                               | 4.104                                                                                                                  |
| $\Delta\rho_{\min}$ , e Å <sup>-3</sup>                     | -0.177                                                                                                            | -0.439                                                                                                                              | -2.411                                                                                                                 |
| CCDC Number                                                 | 2289960                                                                                                           | 2289964                                                                                                                             | 2289961                                                                                                                |

**Table S3.** Crystal and experimental data for **7**, **8** and **9**.

| Peptide                                                     | <b>7</b>                                                                                                                 | <b>8</b>                                                                                                               | <b>9</b>                                                                                                                         |
|-------------------------------------------------------------|--------------------------------------------------------------------------------------------------------------------------|------------------------------------------------------------------------------------------------------------------------|----------------------------------------------------------------------------------------------------------------------------------|
| Formula                                                     | C <sub>39</sub> H <sub>49</sub> ClN <sub>8</sub> O <sub>6</sub> S <sub>2</sub> ,<br>0.5(C <sub>2</sub> H <sub>3</sub> N) | 2(C <sub>39</sub> H <sub>49</sub> BrN <sub>8</sub> O <sub>6</sub> S <sub>2</sub> ),<br>C <sub>2</sub> H <sub>3</sub> N | C <sub>40</sub> H <sub>47</sub> F <sub>3</sub> N <sub>8</sub> O <sub>6</sub> S <sub>2</sub> ,<br>C <sub>3</sub> H <sub>6</sub> O |
| Formula Weight                                              | 845.96                                                                                                                   | 1780.82                                                                                                                | 915.05                                                                                                                           |
| Cell System                                                 | monoclinic                                                                                                               | monoclinic                                                                                                             | triclinic                                                                                                                        |
| Space Group                                                 | P2 <sub>1</sub>                                                                                                          | P2 <sub>1</sub>                                                                                                        | P1                                                                                                                               |
| <i>a</i> , Å                                                | 15.6272(2)                                                                                                               | 15.64800(10)                                                                                                           | 9.4424(4)                                                                                                                        |
| <i>b</i> , Å                                                | 16.6962(2)                                                                                                               | 16.8169(2)                                                                                                             | 9.8919(4)                                                                                                                        |
| <i>c</i> , Å                                                | 16.1368(2)                                                                                                               | 16.1537(2)                                                                                                             | 12.9370(6)                                                                                                                       |
| $\alpha$ , deg                                              | 90.0                                                                                                                     | 90.0                                                                                                                   | 80.097(4)                                                                                                                        |
| $\beta$ , deg                                               | 95.4400(10)                                                                                                              | 95.6830(10)                                                                                                            | 80.867(4)                                                                                                                        |
| $\gamma$ , deg                                              | 90.0                                                                                                                     | 90.0                                                                                                                   | 84.776(4)                                                                                                                        |
| Volume, Å <sup>3</sup>                                      | 4191.37(9)                                                                                                               | 4229.97(8)                                                                                                             | 1172.74(9)                                                                                                                       |
| <i>Z</i>                                                    | 4                                                                                                                        | 2                                                                                                                      | 1                                                                                                                                |
| <i>D<sub>c</sub></i> , g cm <sup>-3</sup>                   | 1.341                                                                                                                    | 1.398                                                                                                                  | 1.296                                                                                                                            |
| <i>F</i> (000)                                              | 1788                                                                                                                     | 1860                                                                                                                   | 482                                                                                                                              |
| $\mu$ , mm <sup>-1</sup>                                    | 2.205 (Cu K $\alpha$ )                                                                                                   | 2.711 (Cu K $\alpha$ )                                                                                                 | 1.607 (Cu K $\alpha$ )                                                                                                           |
| Wavelength, Å                                               | 1.54184                                                                                                                  | 1.54184                                                                                                                | 1.54184                                                                                                                          |
| No. of reflections (obs)                                    | 46819                                                                                                                    | 33721                                                                                                                  | 17517                                                                                                                            |
| <i>R</i> <sub>INT</sub>                                     | 0.0287                                                                                                                   | 0.0838                                                                                                                 | 0.0439                                                                                                                           |
| $\theta_{\max}$ , deg                                       | 74.452                                                                                                                   | 68.247                                                                                                                 | 63.685                                                                                                                           |
| No. of reflections<br>( <i>I</i> > 2 $\sigma$ ( <i>I</i> )) | 16132                                                                                                                    | 12539                                                                                                                  | 4779                                                                                                                             |
| Flack parameter                                             | 0.019(4)                                                                                                                 | -0.010(12)                                                                                                             | 0.023(15)                                                                                                                        |
| <i>R</i> 1                                                  | 0.0428                                                                                                                   | 0.0719                                                                                                                 | 0.1268                                                                                                                           |
| <i>wR</i>                                                   | 0.1329                                                                                                                   | 0.1901                                                                                                                 | 0.3550                                                                                                                           |
| Goodness of fit                                             | 0.718                                                                                                                    | 1.069                                                                                                                  | 1.500                                                                                                                            |
| ( $\Delta/\sigma$ ) <sub>max</sub>                          | 0.001                                                                                                                    | 0.000                                                                                                                  | 0.005                                                                                                                            |
| Fraction for $\theta_{\max}$                                | 0.986                                                                                                                    | 0.983                                                                                                                  | 0.995                                                                                                                            |
| $\Delta\rho_{\max}$ , e Å <sup>-3</sup>                     | 0.769                                                                                                                    | 1.929                                                                                                                  | 0.749                                                                                                                            |
| $\Delta\rho_{\min}$ , e Å <sup>-3</sup>                     | -0.354                                                                                                                   | -0.899                                                                                                                 | -0.429                                                                                                                           |
| CCDC Number                                                 | 2289963                                                                                                                  | 2289962                                                                                                                | 2289965                                                                                                                          |

**Table S4.** Hydrogen bonds in the crystal structures of **2**, **3**, **6**, **7**, **8** and **9**.

| Peptide                  | Donor                                                     | Acceptor                           | Distance (Å) | Angle (°) |
|--------------------------|-----------------------------------------------------------|------------------------------------|--------------|-----------|
|                          | D–H                                                       | A                                  | D...A        | D–H...A   |
| <b>2</b>                 | N[Phe(CH <sub>3</sub> ) <sup>1</sup> ]-H                  | O <sup>γ</sup> (Oxz <sup>6</sup> ) | 3.371        | 155.5     |
|                          | N(D-Val <sup>3</sup> )-H                                  | O(Thz <sup>8</sup> )               | 3.180        | 139.8     |
|                          | N(Ile <sup>5</sup> )-H                                    | O <sup>γ</sup> (Oxz <sup>2</sup> ) | 3.229        | 159.3     |
|                          | N(D-Val <sup>7</sup> )-H                                  | O(Thz <sup>4</sup> )               | 3.225        | 133.8     |
| <b>3</b>                 | W–H                                                       | N(Oxz <sup>2</sup> )               | 2.994        | 150.7     |
|                          | W–H                                                       | N(Oxz <sup>6</sup> )               | 3.004        | 153.6     |
|                          | N[Phe(C(CH <sub>3</sub> ) <sub>3</sub> ) <sup>1</sup> ]-H | W                                  | 2.981        | 146.8     |
|                          | N(Ile <sup>5</sup> )-H                                    | W                                  | 2.964        | 146.9     |
| <b>6</b><br>(molecule A) | N[Phe(I) <sup>1</sup> ]-H                                 | O <sup>γ</sup> (Oxz <sup>6</sup> ) | 3.056        | 153.9     |
|                          | N(D-Val <sup>3</sup> )-H                                  | O(Thz <sup>8</sup> )               | 3.077        | 147.0     |
|                          | N(Ile <sup>5</sup> )-H                                    | O <sup>γ</sup> (Oxz <sup>2</sup> ) | 3.196        | 124.1     |
|                          | N(D-Val <sup>7</sup> )-H                                  | O(Thz <sup>4</sup> )               | 3.491        | 155.4     |
| <b>6</b><br>(molecule B) | N[Phe(I) <sup>1</sup> ]-H                                 | O <sup>γ</sup> (Oxz <sup>6</sup> ) | 3.089        | 152.7     |
|                          | N(D-Val <sup>3</sup> )-H                                  | O(Thz <sup>8</sup> )               | 3.099        | 145.6     |
|                          | N(Ile <sup>5</sup> )-H                                    | O <sup>γ</sup> (Oxz <sup>2</sup> ) | 3.321        | 155.0     |
|                          | N(D-Val <sup>7</sup> )-H                                  | O(Thz <sup>4</sup> )               | 3.201        | 129.0     |
| <b>7</b><br>(molecule A) | N[Phe(Cl) <sup>1</sup> ]-H                                | O <sup>γ</sup> (Oxz <sup>6</sup> ) | 3.200        | 159.6     |
|                          | N(D-Val <sup>3</sup> )-H                                  | O(Thz <sup>8</sup> )               | 3.067        | 140.9     |
|                          | N(Ile <sup>5</sup> )-H                                    | O <sup>γ</sup> (Oxz <sup>2</sup> ) | 3.325        | 161.0     |
|                          | N(D-Val <sup>7</sup> )-H                                  | O(Thz <sup>4</sup> )               | 3.149        | 131.1     |
| <b>7</b><br>(molecule B) | N[Phe(Cl) <sup>1</sup> ]-H                                | O <sup>γ</sup> (Oxz <sup>6</sup> ) | 3.225        | 157.1     |
|                          | N(D-Val <sup>3</sup> )-H                                  | O(Thz <sup>8</sup> )               | 3.160        | 148.3     |
|                          | N(Ile <sup>5</sup> )-H                                    | O <sup>γ</sup> (Oxz <sup>2</sup> ) | 3.241        | 158.1     |
|                          | N(D-Val <sup>7</sup> )-H                                  | O(Thz <sup>4</sup> )               | 3.165        | 135.6     |
| <b>8</b><br>(molecule A) | N[Phe(Br) <sup>1</sup> ]-H                                | O <sup>γ</sup> (Oxz <sup>6</sup> ) | 3.194        | 158.1     |
|                          | N(D-Val <sup>3</sup> )-H                                  | O(Thz <sup>8</sup> )               | 3.066        | 142.4     |
|                          | N(Ile <sup>5</sup> )-H                                    | O <sup>γ</sup> (Oxz <sup>2</sup> ) | 3.312        | 160.7     |
|                          | N(D-Val <sup>7</sup> )-H                                  | O(Thz <sup>4</sup> )               | 3.158        | 130.5     |
| <b>8</b><br>(molecule B) | N[Phe(Br) <sup>1</sup> ]-H                                | O <sup>γ</sup> (Oxz <sup>6</sup> ) | 3.280        | 155.3     |
|                          | N(D-Val <sup>3</sup> )-H                                  | O(Thz <sup>8</sup> )               | 3.154        | 149.6     |
|                          | N(Ile <sup>5</sup> )-H                                    | O <sup>γ</sup> (Oxz <sup>2</sup> ) | 3.282        | 157.7     |
|                          | N(D-Val <sup>7</sup> )-H                                  | O(Thz <sup>4</sup> )               | 3.181        | 136.8     |
| <b>9</b>                 | N[Phe(CF <sub>3</sub> ) <sup>1</sup> ]-H                  | O(Ac <sub>2</sub> O)               | 3.122        | 153.0     |
|                          | N(Ile <sup>5</sup> )-H                                    | O(Ac <sub>2</sub> O)               | 3.054        | 162.6     |

A letter of W represents the oxygen atom of water.



## The CH $\cdots\pi$ contacts within the folded forms of 2 and 4.

The distances between the  $\gamma$ H atoms of  $\text{Oxz}^2$  side chains to the  $\pi$ -orbital of  $\text{Phe(X)}^1$  in folded forms were estimated by surveying the  $\text{CH}\cdots\pi$  contacts for the six-membered  $\pi$ -system, as described by Umezawa *et al.* (Y. Umezawa *et al.*, *Bull. Chem. Soc. Jpn.*, 1998, **71**, 1207-1213) (Fig. S25). The distance between a C-H hydrogen atom and the  $\pi$ -plane, the distance between H and the line  $\text{C}^1\text{-C}^2$ , and the  $\text{H/C}^1$  interatomic distance are defined as  $D_{\text{pln}}$ ,  $D_{\text{lin}}$  and  $D_{\text{atm}}$ , respectively. These distance parameters ( $D_{\text{pln}}$ ,  $D_{\text{lin}}$  and  $D_{\text{atm}}$ ) correspond to regions 1, 2 and 3, respectively. A C-H hydrogen atom is positioned above the  $\pi$ -plane in region 1 or at a position where it is able to contact the  $\pi$ -orbital in regions 2 and 3. An alkyl group can interact with the  $\pi$ -group in regions where the hydrogen atom is above the  $\pi$ -plane but slightly offset, outside the ring. The dihedral angles determined by the  $\pi$ -plane, plane  $\text{H-C}^1\text{-C}^2$  and angle  $\angle\text{H-X-C}^1$  ( $\text{X}=\text{C}$ ,  $\text{O}$ , etc.) are defined as  $\omega$  and  $\theta$ , respectively. The distances from the  $\gamma$ H atoms of  $\text{Oxz}^2$  to the  $\pi$ -orbital of the  $\text{Phe(X)}^1$  residue in the crystal structures of peptides are listed in Table S5.

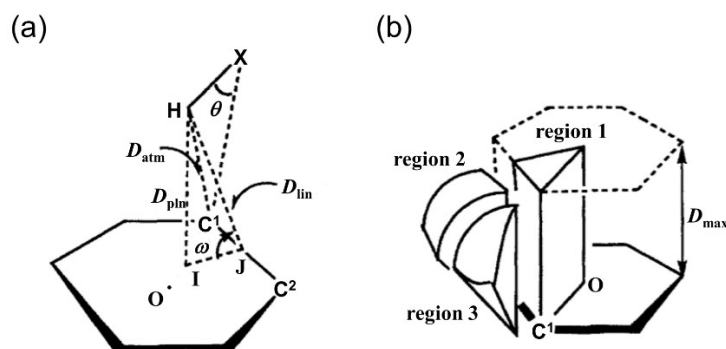

**Fig. S25** Method for surveying  $\text{CH}\cdots\pi$  contacts in a six-membered  $\pi$ -system (Y. Umezawa *et al.*, *Bull. Chem. Soc. Jpn.*, 1998, **71**, 1207-1213). (a) O: center of the plane.  $\text{C}^1$  and  $\text{C}^2$ : nearest and second nearest  $\text{sp}^2$ -carbons to H.  $\omega$ : dihedral angle defined by the  $\text{C}^1\text{OC}^2$  and  $\text{HC}^1\text{C}^2$  planes.  $\theta$ :  $\angle\text{HXC}^1$ .  $D_{\text{pln}}$ :  $\text{H}/\pi$ -plane distance ( $\text{H/I}$ ).  $D_{\text{atm}}$ : interatomic distance ( $\text{H/C}^1$ ).  $D_{\text{lin}}$ : distance between H and line  $\text{C}^1\text{C}^2$  ( $\text{H/J}$ ). (b) 1: region where H is above the aromatic ring. 2 and 3: regions where H is outside region 1 but may interact with the  $\pi$ -orbitals.  $D_{\text{pln}} < D_{\text{max}}$ ,  $\theta < 60^\circ$ ,  $|\omega| < 90^\circ$  for region 1;  $D_{\text{lin}} > D_{\text{max}}$ ,  $\theta < 60^\circ$ ,  $90^\circ < |\omega| < 130^\circ$  for region 2; and  $D_{\text{atm}} < D_{\text{max}}$ ,  $\theta < 60^\circ$ ,  $50^\circ < \phi < 90^\circ$  for region 3 ( $\phi$ :  $\text{HC}^1\text{I}$ ). ( $\theta$  should be smaller than  $60^\circ$  to avoid contact of atom X with  $\text{C}^1$ ).  $D_{\text{max}}$ : cutoff value in every region.

**Table S5.** The distances from the  $\gamma$ H atoms of Oxz<sup>2</sup> side chains to the  $\pi$ -orbital of the Phe(X)<sup>1</sup> residue and angle parameters ( $\theta$  and  $\omega$ ) within the crystal structures of peptides were estimated by surveying the CH $\cdots\pi$  contacts in a six-membered  $\pi$ -system.

|              | <b>2</b>           | <b>4</b>           |
|--------------|--------------------|--------------------|
| $\theta$ (°) | 35.10              | 40.69              |
| $\omega$ (°) | 96.54              | 72.89              |
| Region       | 2                  | 1                  |
| Distance (Å) | 3.233 <sup>a</sup> | 2.893 <sup>b</sup> |

<sup>a</sup> These distance parameters determined as  $D_{\text{lin}}$  correspond to region 2.

<sup>b</sup> This distance parameter determined as  $D_{\text{pln}}$  corresponds to region 1.



## Thermodynamic parameters and van't Hoff plots for peptides 1, 2, 3, 5, 6, 7, 8, 9 and 10.

**Table S6.** Equilibrium parameters of peptide 1.

| $T$ (K) | $\delta_{\text{obs Thz}^{4\text{or}8} \text{H}}$ (ppm) | $K^*$ | $\Delta G^\circ$ ( $\text{J}\cdot\text{mol}^{-1}$ )** |
|---------|--------------------------------------------------------|-------|-------------------------------------------------------|
| 273     | 7.50                                                   | 3.901 | -3089                                                 |
| 283     | 7.52                                                   | 3.265 | -2784                                                 |
| 293     | 7.55                                                   | 2.709 | -2428                                                 |
| 303     | 7.58                                                   | 2.253 | -2046                                                 |
| 313     | 7.61                                                   | 1.835 | -1580                                                 |
| 323     | 7.64                                                   | 1.513 | -1112                                                 |
| 333     | 7.68                                                   | 1.236 | -586                                                  |

\*Equilibrium constants were calculated from the average value of the chemical shifts of Thz<sup>4</sup> and Thz<sup>8</sup> protons:  $K = (\delta_s - \delta_{\text{obs}}) / (\delta_{\text{obs}} - \delta_f)$ .  $\delta_s$  (8.09 ppm) is the chemical shift for Thz proton of T3ASC.  $\delta_f$  (7.35 ppm) is the chemical shift for Thz proton of *d*ASC at 273 K.

\*\* $\Delta G^\circ = -RT \ln K$

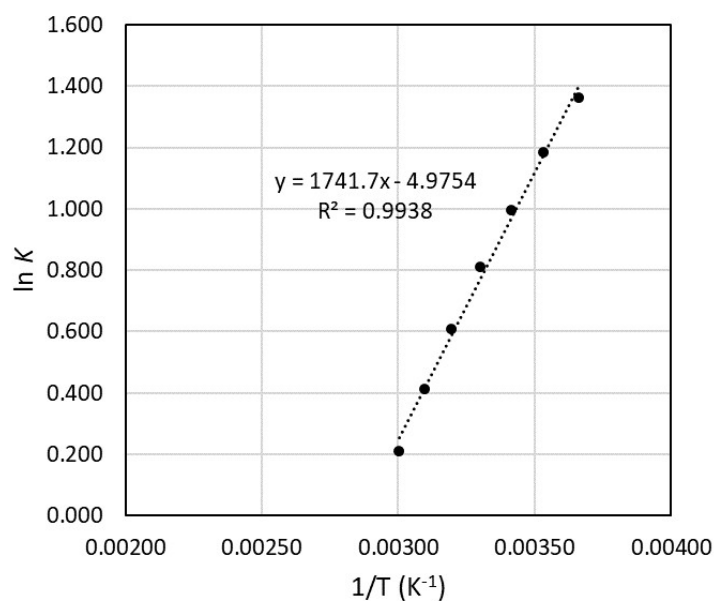

**Fig. S26** van't Hoff plot of peptide 1.

**Table S7.** Thermodynamic parameters of peptide 1.

| $\Delta H^\circ$ ( $\text{kJ}\cdot\text{mol}^{-1}$ ) | $\Delta S^\circ$ ( $\text{J}\cdot\text{mol}^{-1}$ ) | $\Delta G^\circ_{298\text{K}}$ ( $\text{kJ}\cdot\text{mol}^{-1}$ )* |
|------------------------------------------------------|-----------------------------------------------------|---------------------------------------------------------------------|
| -14.48                                               | -41.37                                              | -2.15                                                               |

\* $\Delta G^\circ = \Delta H^\circ - T\Delta S^\circ$

**Table S8.** Equilibrium parameters of peptide 2.

| $T$ (K) | $\delta_{\text{obs}} \text{Thz}^{4\text{or}8} \text{H}$ (ppm) | $K^*$ | $\Delta G^\circ$ ( $\text{J}\cdot\text{mol}^{-1}$ )** |
|---------|---------------------------------------------------------------|-------|-------------------------------------------------------|
| 273     | 7.511                                                         | 3.596 | -2905                                                 |
| 283     | 7.533                                                         | 3.044 | -2619                                                 |
| 293     | 7.558                                                         | 2.558 | -2288                                                 |
| 303     | 7.588                                                         | 2.109 | -1880                                                 |
| 313     | 7.620                                                         | 1.741 | -1442                                                 |
| 323     | 7.653                                                         | 1.442 | -983                                                  |
| 333     | 7.688                                                         | 1.189 | -480                                                  |

\*Equilibrium constants were calculated from the average value of the chemical shifts of Thz<sup>4</sup> and Thz<sup>8</sup> protons:  $K = (\delta_s - \delta_{\text{obs}}) / (\delta_{\text{obs}} - \delta_f)$ .  $\delta_s$  (8.09 ppm) is the chemical shift for Thz proton of T3ASC.  $\delta_f$  (7.35 ppm) is the chemical shift for Thz proton of *d*ASC at 273 K.

\*\* $\Delta G^\circ = -RT \ln K$

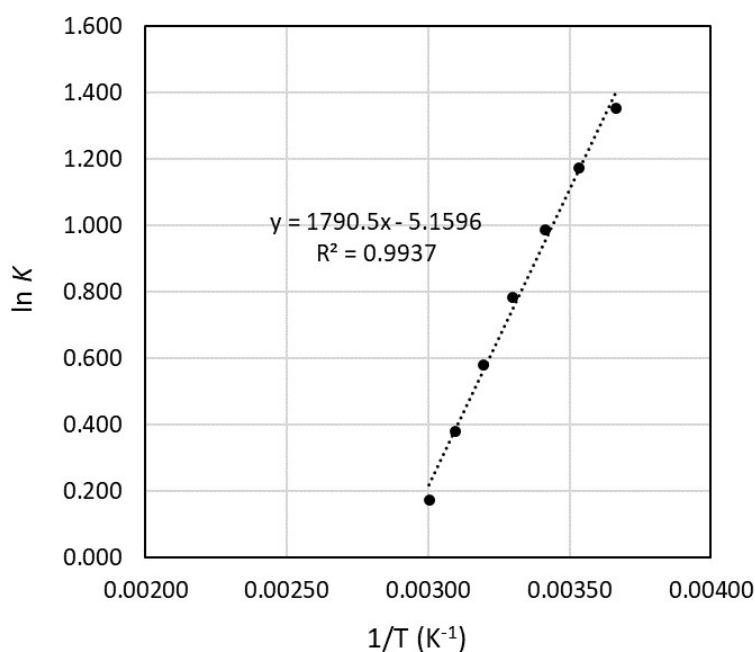**Fig. S27** van't Hoff plot of peptide 2.**Table S9.** Thermodynamic parameters of peptide 2.

| $\Delta H^\circ$ ( $\text{kJ}\cdot\text{mol}^{-1}$ ) | $\Delta S^\circ$ ( $\text{J}\cdot\text{mol}^{-1}$ ) | $\Delta G^\circ_{298\text{K}}$ ( $\text{kJ}\cdot\text{mol}^{-1}$ )* |
|------------------------------------------------------|-----------------------------------------------------|---------------------------------------------------------------------|
| -14.89                                               | -42.90                                              | -2.10                                                               |

\* $\Delta G^\circ = \Delta H^\circ - T\Delta S^\circ$

**Table S10.** Equilibrium parameters of peptide 3.

| $T$ (K) | $\delta_{\text{obs}}$ Thz <sup>4or8</sup> H (ppm) | $K^*$ | $\Delta G^\circ$ (J $\cdot$ mol <sup>-1</sup> )** |
|---------|---------------------------------------------------|-------|---------------------------------------------------|
| 273     | 7.51                                              | 3.540 | -2869                                             |
| 283     | 7.53                                              | 3.077 | -2645                                             |
| 293     | 7.56                                              | 2.601 | -2329                                             |
| 303     | 7.58                                              | 2.197 | -1982                                             |
| 313     | 7.61                                              | 1.841 | -1588                                             |
| 323     | 7.64                                              | 1.517 | -1119                                             |
| 333     | 7.68                                              | 1.256 | -631                                              |

\*Equilibrium constants were calculated from the average value of the chemical shifts of Thz<sup>4</sup> and Thz<sup>8</sup> protons:  $K = (\delta_s - \delta_{\text{obs}}) / (\delta_{\text{obs}} - \delta_f)$ .  $\delta_s$  (8.09 ppm) is the chemical shift for Thz proton of T3ASC.  $\delta_f$  (7.35 ppm) is the chemical shift for Thz proton of *d*ASC at 273 K.

\*\* $\Delta G^\circ = -RT \ln K$

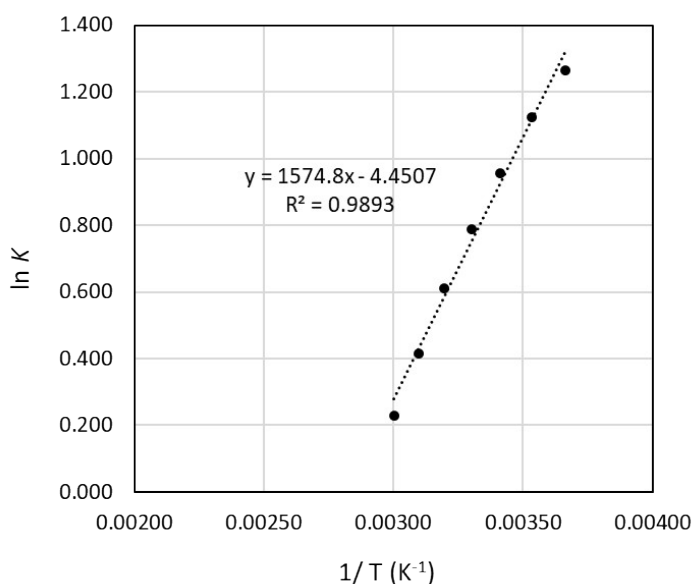**Fig. S28** van't Hoff plot of peptide 3.**Table S11.** Thermodynamic parameters of peptide 3.

| $\Delta H^\circ$ (kJ $\cdot$ mol <sup>-1</sup> ) | $\Delta S^\circ$ (J $\cdot$ mol <sup>-1</sup> ) | $\Delta G^\circ_{298K}$ (kJ $\cdot$ mol <sup>-1</sup> )* |
|--------------------------------------------------|-------------------------------------------------|----------------------------------------------------------|
| -13.09                                           | -37.00                                          | -2.07                                                    |

\* $\Delta G^\circ = \Delta H^\circ - T\Delta S^\circ$

**Table S12.** Equilibrium parameters of peptide 5.

| $T$ (K) | $\delta_{\text{obs}}$ Thz <sup>4or8</sup> H (ppm) | $K^*$ | $\Delta G^\circ$ (J $\cdot$ mol <sup>-1</sup> )** |
|---------|---------------------------------------------------|-------|---------------------------------------------------|
| 273     | 7.52                                              | 3.485 | -2834                                             |
| 283     | 7.54                                              | 2.895 | -2501                                             |
| 293     | 7.57                                              | 2.387 | -2119                                             |
| 303     | 7.60                                              | 1.931 | -1657                                             |
| 313     | 7.64                                              | 1.565 | -1166                                             |
| 323     | 7.68                                              | 1.260 | -620                                              |
| 333     | 7.72                                              | 1.005 | -15                                               |

\*Equilibrium constants were calculated from the average value of the chemical shifts of Thz<sup>4</sup> and Thz<sup>8</sup> protons:  $K = (\delta_s - \delta_{\text{obs}}) / (\delta_{\text{obs}} - \delta_f)$ .  $\delta_s$  (8.09 ppm) is the chemical shift for Thz proton of T3ASC.  $\delta_f$  (7.35 ppm) is the chemical shift for Thz proton of *d*ASC at 273 K.

\*\* $\Delta G^\circ = -RT \ln K$

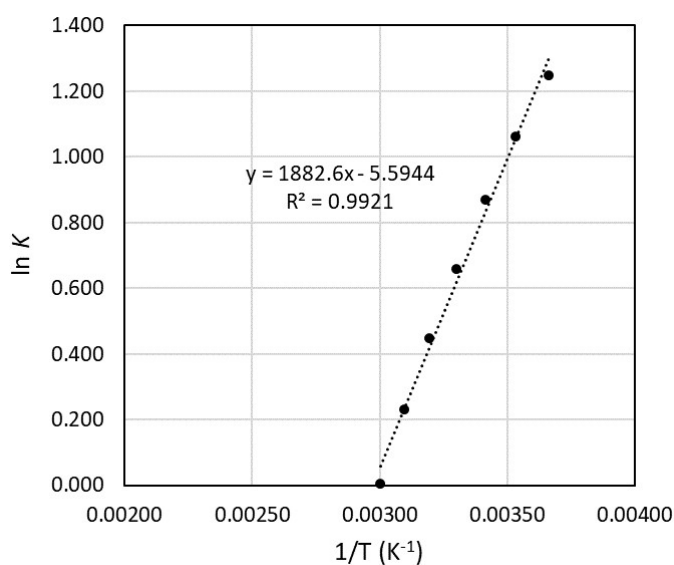**Fig. S29** van't Hoff plot of peptide 5.**Table S13.** Thermodynamic parameters of peptide 5.

| $\Delta H^\circ$ (kJ $\cdot$ mol <sup>-1</sup> ) | $\Delta S^\circ$ (J $\cdot$ mol <sup>-1</sup> ) | $\Delta G^\circ_{298K}$ (kJ $\cdot$ mol <sup>-1</sup> )* |
|--------------------------------------------------|-------------------------------------------------|----------------------------------------------------------|
| -15.65                                           | -46.51                                          | -1.79                                                    |

\* $\Delta G^\circ = \Delta H^\circ - T\Delta S^\circ$

**Table S14.** Equilibrium parameters of peptide 6.

| $T$ (K) | $\delta_{\text{obs}}$ Thz <sup>4or8</sup> H (ppm) | $K^*$ | $\Delta G^\circ$ (J $\cdot$ mol <sup>-1</sup> )** |
|---------|---------------------------------------------------|-------|---------------------------------------------------|
| 273     | 7.50                                              | 3.805 | -3033                                             |
| 283     | 7.53                                              | 3.134 | -2688                                             |
| 293     | 7.56                                              | 2.575 | -2304                                             |
| 303     | 7.59                                              | 2.083 | -1849                                             |
| 313     | 7.62                                              | 1.701 | -1382                                             |
| 323     | 7.66                                              | 1.360 | -827                                              |
| 333     | 7.70                                              | 1.102 | -270                                              |

\*Equilibrium constants were calculated from the average value of the chemical shifts of Thz<sup>4</sup> and Thz<sup>8</sup> protons:  $K = (\delta_s - \delta_{\text{obs}}) / (\delta_{\text{obs}} - \delta_f)$ .  $\delta_s$  (8.09 ppm) is the chemical shift for Thz proton of T3ASC.  $\delta_f$  (7.35 ppm) is the chemical shift for Thz proton of *d*ASC at 273 K.

\*\* $\Delta G^\circ = -RT \ln K$

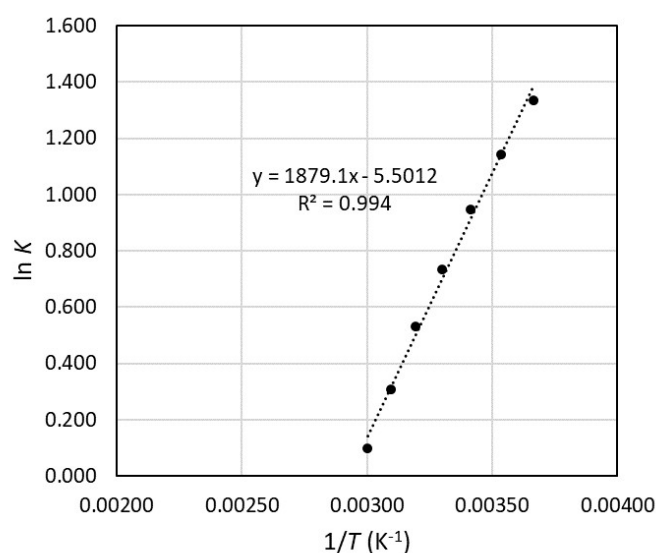**Fig. S30** van't Hoff plot of peptide 6.**Table S15.** Thermodynamic parameters of peptide 6.

| $\Delta H^\circ$ (kJ $\cdot$ mol <sup>-1</sup> ) | $\Delta S^\circ$ (J $\cdot$ mol <sup>-1</sup> ) | $\Delta G^\circ_{298K}$ (kJ $\cdot$ mol <sup>-1</sup> )* |
|--------------------------------------------------|-------------------------------------------------|----------------------------------------------------------|
| -15.62                                           | -45.74                                          | -1.99                                                    |

\* $\Delta G^\circ = \Delta H^\circ - T\Delta S^\circ$



**Table S16.** Equilibrium parameters of peptide 7.

| $T$ (K) | $\delta_{\text{obs}}$ Thz <sup>4or8</sup> H (ppm) | $K^*$ | $\Delta G^\circ$ (J $\cdot$ mol <sup>-1</sup> )** |
|---------|---------------------------------------------------|-------|---------------------------------------------------|
| 273     | 7.51                                              | 3.512 | -2851                                             |
| 283     | 7.54                                              | 2.915 | -2518                                             |
| 293     | 7.57                                              | 2.410 | -2143                                             |
| 303     | 7.60                                              | 1.937 | -1665                                             |
| 313     | 7.64                                              | 1.578 | -1188                                             |
| 323     | 7.68                                              | 1.266 | -634                                              |
| 333     | 7.72                                              | 1.005 | -15                                               |

\*Equilibrium constants were calculated from the average value of the chemical shifts of Thz<sup>4</sup> and Thz<sup>8</sup> protons:  $K = (\delta_s - \delta_{\text{obs}}) / (\delta_{\text{obs}} - \delta_f)$ .  $\delta_s$  (8.09 ppm) is the chemical shift for Thz proton of T3ASC.  $\delta_f$  (7.35 ppm) is the chemical shift for Thz proton of *d*ASC at 273 K.

\*\* $\Delta G^\circ = -RT \ln K$

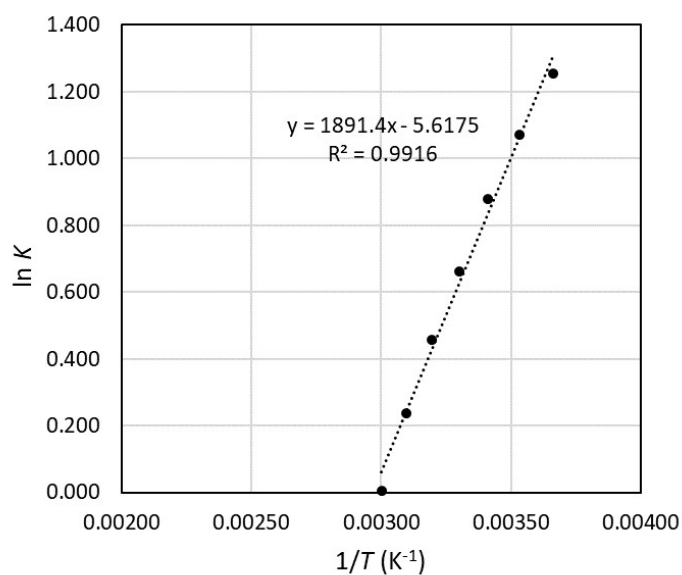**Fig. S31** van't Hoff plot of peptide 7.**Table S17.** Thermodynamic parameters of peptide 7.

| $\Delta H^\circ$ (kJ $\cdot$ mol <sup>-1</sup> ) | $\Delta S^\circ$ (J $\cdot$ mol <sup>-1</sup> ) | $\Delta G^\circ_{298K}$ (kJ $\cdot$ mol <sup>-1</sup> )* |
|--------------------------------------------------|-------------------------------------------------|----------------------------------------------------------|
| -15.73                                           | -46.70                                          | -1.81                                                    |

\* $\Delta G^\circ = \Delta H^\circ - T\Delta S^\circ$

**Table S18.** Equilibrium parameters of peptide **8**.

| $T$ (K) | $\delta_{\text{obs}}$ Thz <sup>4or8</sup> H (ppm) | $K^*$ | $\Delta G^\circ$ (J $\cdot$ mol <sup>-1</sup> )** |
|---------|---------------------------------------------------|-------|---------------------------------------------------|
| 273     | 7.52                                              | 3.485 | -2834                                             |
| 283     | 7.54                                              | 2.936 | -2534                                             |
| 293     | 7.57                                              | 2.418 | -2151                                             |
| 303     | 7.60                                              | 1.960 | -1695                                             |
| 313     | 7.64                                              | 1.578 | -1188                                             |
| 323     | 7.68                                              | 1.266 | -634                                              |
| 333     | 7.72                                              | 1.011 | -30                                               |

\*Equilibrium constants were calculated from the average value of the chemical shifts of Thz<sup>4</sup> and Thz<sup>8</sup> protons:  $K = (\delta_s - \delta_{\text{obs}}) / (\delta_{\text{obs}} - \delta_f)$ .  $\delta_s$  (8.09 ppm) is the chemical shift for Thz proton of T3ASC.  $\delta_f$  (7.35 ppm) is the chemical shift for Thz proton of *d*ASC at 273 K.

\*\* $\Delta G^\circ = -RT \ln K$

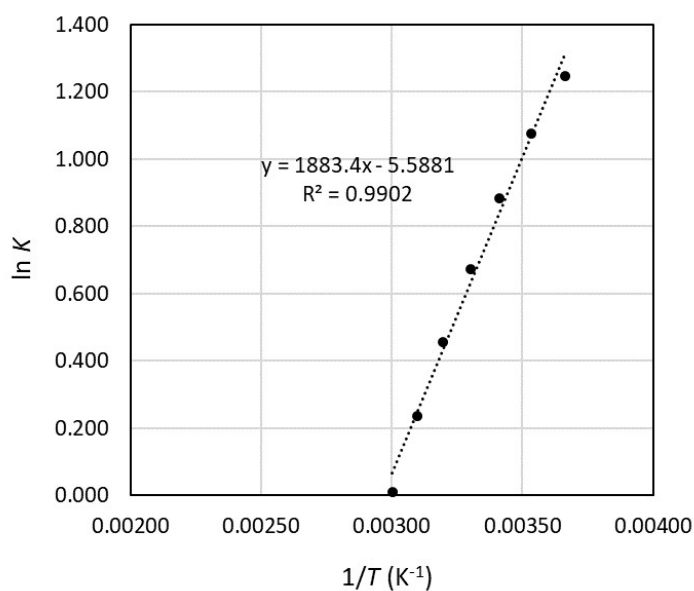**Fig. S32** van't Hoff plot of peptide **8**.**Table S19.** Thermodynamic parameters of peptide **8**.

| $\Delta H^\circ$ (kJ $\cdot$ mol <sup>-1</sup> ) | $\Delta S^\circ$ (J $\cdot$ mol <sup>-1</sup> ) | $\Delta G^\circ_{298\text{K}}$ (kJ $\cdot$ mol <sup>-1</sup> )* |
|--------------------------------------------------|-------------------------------------------------|-----------------------------------------------------------------|
| -15.66                                           | -46.46                                          | -1.81                                                           |

\* $\Delta G^\circ = \Delta H^\circ - T\Delta S^\circ$

**Table S20.** Equilibrium parameters of peptide **9**.

| $T$ (K) | $\delta_{\text{obs}}$ Thz <sup>4or8</sup> H (ppm) | $K^*$ | $\Delta G^\circ$ (J $\cdot$ mol <sup>-1</sup> )** |
|---------|---------------------------------------------------|-------|---------------------------------------------------|
| 273     | 7.53                                              | 3.111 | -2576                                             |
| 283     | 7.55                                              | 2.645 | -2289                                             |
| 293     | 7.58                                              | 2.210 | -1932                                             |
| 303     | 7.61                                              | 1.841 | -1537                                             |
| 313     | 7.64                                              | 1.513 | -1077                                             |
| 323     | 7.68                                              | 1.236 | -568                                              |
| 333     | 7.72                                              | 1.000 | 0                                                 |

\*Equilibrium constants were calculated from the average value of the chemical shifts of Thz<sup>4</sup> and Thz<sup>8</sup> protons:  $K = (\delta_s - \delta_{\text{obs}}) / (\delta_{\text{obs}} - \delta_f)$ .  $\delta_s$  (8.09 ppm) is the chemical shift for Thz proton of T3ASC.  $\delta_f$  (7.35 ppm) is the chemical shift for Thz proton of *d*ASC at 273 K.

\*\* $\Delta G^\circ = -RT \ln K$

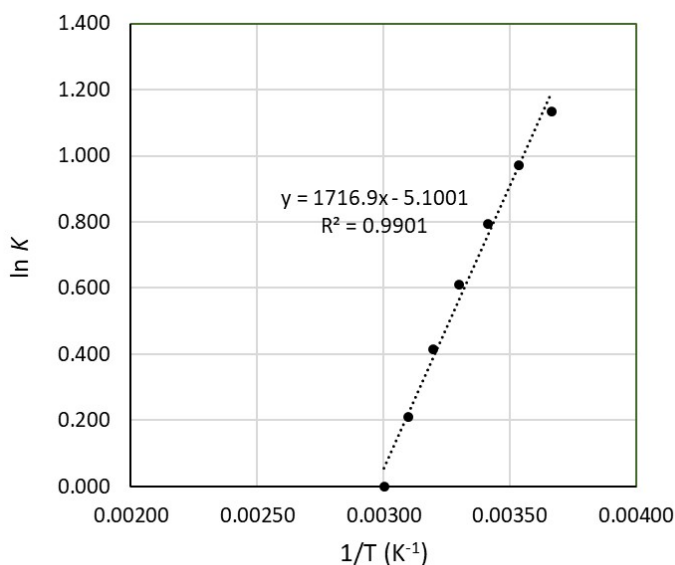**Fig. S33** van't Hoff plot of peptide **9**.**Table S21.** Thermodynamic parameters of peptide **9**.

| $\Delta H^\circ$ (kJ $\cdot$ mol <sup>-1</sup> ) | $\Delta S^\circ$ (J $\cdot$ mol <sup>-1</sup> ) | $\Delta G^\circ_{298K}$ (kJ $\cdot$ mol <sup>-1</sup> )* |
|--------------------------------------------------|-------------------------------------------------|----------------------------------------------------------|
| -14.27                                           | -42.40                                          | -1.64                                                    |

\* $\Delta G^\circ = \Delta H^\circ - T\Delta S^\circ$

**Table S22.** Equilibrium parameters of peptide **10**.

| $T$ (K) | $\delta_{\text{obs}}$ Thz <sup>4or8</sup> H (ppm) | $K^*$ | $\Delta G^\circ$ (J $\cdot$ mol <sup>-1</sup> )** |
|---------|---------------------------------------------------|-------|---------------------------------------------------|
| 273     | 7.54                                              | 2.957 | -2461                                             |
| 283     | 7.57                                              | 2.442 | -2101                                             |
| 293     | 7.60                                              | 2.002 | -1691                                             |
| 303     | 7.63                                              | 1.629 | -1229                                             |
| 313     | 7.67                                              | 1.313 | -708                                              |
| 323     | 7.71                                              | 1.058 | -152                                              |
| 333     | 7.75                                              | 0.852 | 442                                               |

\*Equilibrium constants were calculated from the average value of the chemical shifts of Thz<sup>4</sup> and Thz<sup>8</sup> protons:  $K = (\delta_s - \delta_{\text{obs}}) / (\delta_{\text{obs}} - \delta_f)$ .  $\delta_s$  (8.09 ppm) is the chemical shift for Thz proton of T3ASC.  $\delta_f$  (7.35 ppm) is the chemical shift for Thz proton of *d*ASC at 273 K.

\*\* $\Delta G^\circ = -RT \ln K$

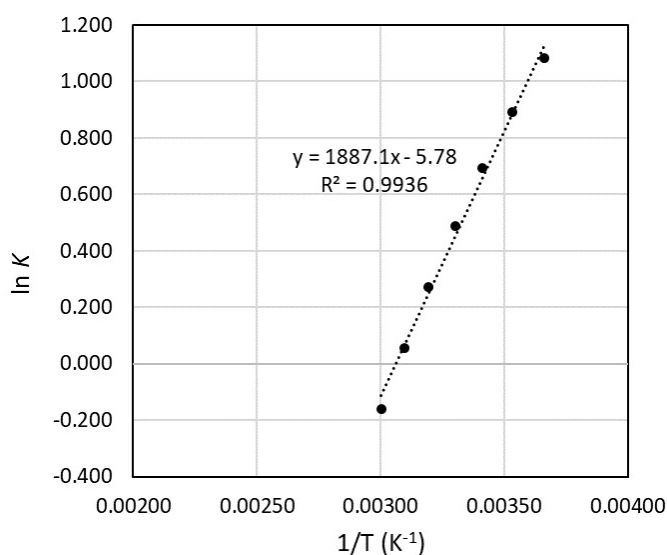**Fig. S34** van't Hoff plot of peptide **10**.**Table S23.** Thermodynamic parameters of peptide **10**.

| $\Delta H^\circ$ (kJ $\cdot$ mol <sup>-1</sup> ) | $\Delta S^\circ$ (J $\cdot$ mol <sup>-1</sup> ) | $\Delta G^\circ_{298K}$ (kJ $\cdot$ mol <sup>-1</sup> )* |
|--------------------------------------------------|-------------------------------------------------|----------------------------------------------------------|
| -15.69                                           | -48.05                                          | -1.37                                                    |

\* $\Delta G^\circ = \Delta H^\circ - T\Delta S^\circ$

## Coupling constants ( ${}^2J_{\beta_1\beta_2}$ , ${}^3J_{\alpha\beta_1}$ and ${}^3J_{\alpha\beta_2}$ ) of Phe(X) residue at 273-333 K.

Peptide 1 (X=OCH<sub>3</sub>)

| T (K) | ${}^2J_{\beta_1\beta_2}$ | ${}^3J_{\alpha\beta_1}$ | ${}^3J_{\alpha\beta_2}$ |
|-------|--------------------------|-------------------------|-------------------------|
| 273   | 13.2                     | 5.4                     | 13.2                    |
| 283   | 13.2                     | 5.4                     | 13.2                    |
| 293   | 13.2                     | 5.4                     | 13.2                    |
| 303   | 13.2                     | 5.4                     | 11.4                    |
| 313   | 13.2                     | 6.0                     | 11.4                    |
| 323   | 13.2                     | 6.0                     | 10.8                    |
| 333   | 13.2                     | 6.6                     | 10.8                    |

Peptide 2 (X=CH<sub>3</sub>)

| T (K) | ${}^2J_{\beta_1\beta_2}$ | ${}^3J_{\alpha\beta_1}$ | ${}^3J_{\alpha\beta_2}$ |
|-------|--------------------------|-------------------------|-------------------------|
| 273   | 13.2                     | 4.8                     | 12.6                    |
| 283   | 13.2                     | 5.4                     | 11.4                    |
| 293   | 13.2                     | 5.4                     | 11.4                    |
| 303   | 13.2                     | 5.4                     | 10.8                    |
| 313   | 13.2                     | 5.4                     | 10.8                    |
| 323   | 13.2                     | 5.4                     | 10.8                    |
| 333   | 13.2                     | 6.0                     | 10.2                    |

Peptide 3 [X=C(CH<sub>3</sub>)<sub>3</sub>]

| T (K) | ${}^2J_{\beta_1\beta_2}$ | ${}^3J_{\alpha\beta_1}$ | ${}^3J_{\alpha\beta_2}$ |
|-------|--------------------------|-------------------------|-------------------------|
| 273   | 13.2                     | 5.4                     | 13.2                    |
| 283   | 13.2                     | 5.4                     | 12.0                    |
| 293   | 13.2                     | 5.4                     | 12.0                    |
| 303   | 13.2                     | 6.0                     | 11.4                    |
| 313   | 13.2                     | 6.0                     | 11.4                    |
| 323   | 13.2                     | 6.6                     | 10.2                    |
| 333   |                          | 7.8                     | 7.8                     |

Peptide 4 (X=H)

| T (K) | ${}^2J_{\beta_1\beta_2}$ | ${}^3J_{\alpha\beta_1}$ | ${}^3J_{\alpha\beta_2}$ |
|-------|--------------------------|-------------------------|-------------------------|
| 273   | 13.2                     | 4.8                     | 13.2                    |
| 283   | 13.2                     | 5.4                     | 13.2                    |
| 293   | 13.2                     | 5.4                     | 11.4                    |
| 303   | 13.2                     | 5.4                     | 10.8                    |
| 313   | 13.5                     | 5.4                     | 10.8                    |
| 323   | 13.5                     | 6.0                     | 10.2                    |
| 333   | 13.5                     | 6.0                     | 10.2                    |

Peptide 5 (X=F)

| T (K) | ${}^2J_{\beta_1\beta_2}$ | ${}^3J_{\alpha\beta_1}$ | ${}^3J_{\alpha\beta_2}$ |
|-------|--------------------------|-------------------------|-------------------------|
| 273   | 12.9                     | 5.4                     | 12.6                    |
| 283   | 13.2                     | 5.4                     | 11.4                    |
| 293   | 13.5                     | 5.4                     | 11.4                    |
| 303   | 13.2                     | 5.4                     | 10.8                    |
| 313   | 13.2                     | 5.4                     | 10.8                    |
| 323   | 13.8                     | 5.4                     | 10.2                    |
| 333   | 13.8                     | 6.0                     | 9.6                     |

Peptide 6 (X=I)

| T (K) | ${}^2J_{\beta_1\beta_2}$ | ${}^3J_{\alpha\beta_1}$ | ${}^3J_{\alpha\beta_2}$ |
|-------|--------------------------|-------------------------|-------------------------|
| 273   | 13.2                     | 5.4                     | 12.0                    |
| 283   | 13.2                     | 6.0                     | 12.0                    |
| 293   | 13.2                     | 6.0                     | 11.4                    |
| 303   | 13.2                     | 6.0                     | 10.8                    |
| 313   | 13.2                     | 6.0                     | 10.2                    |
| 323   | 13.2                     | 6.0                     | 9.6                     |
| 333   |                          | 7.8                     | 7.8                     |

Peptide 7 (X=Cl)

| T (K) | ${}^2J_{\beta_1\beta_2}$ | ${}^3J_{\alpha\beta_1}$ | ${}^3J_{\alpha\beta_2}$ |
|-------|--------------------------|-------------------------|-------------------------|
| 273   | 13.2                     | 5.4                     | 12.0                    |
| 283   | 13.2                     | 5.4                     | 11.4                    |
| 293   | 13.2                     | 5.4                     | 10.8                    |
| 303   | 13.2                     | 5.4                     | 10.8                    |
| 313   | 13.2                     | 7.2                     | 10.8                    |
| 323   | 13.2                     | 7.2                     | 9.6                     |
| 333   | 13.2                     | 7.8                     | 7.8                     |

Peptide 8 (X=Br)

| T (K) | ${}^2J_{\beta_1\beta_2}$ | ${}^3J_{\alpha\beta_1}$ | ${}^3J_{\alpha\beta_2}$ |
|-------|--------------------------|-------------------------|-------------------------|
| 273   | 13.2                     | 5.4                     | 12.0                    |
| 283   | 13.2                     | 5.4                     | 11.4                    |
| 293   | 13.2                     | 5.4                     | 11.4                    |
| 303   | 13.2                     | 5.4                     | 11.4                    |
| 313   | 13.2                     | 6.6                     | 9.6                     |
| 323   | 13.2                     | 6.6                     | 9.6                     |
| 333   |                          | 7.8                     | 7.8                     |

Peptide 9 (X=CF<sub>3</sub>)

| T (K) | ${}^2J_{\beta_1\beta_2}$ | ${}^3J_{\alpha\beta_1}$ | ${}^3J_{\alpha\beta_2}$ |
|-------|--------------------------|-------------------------|-------------------------|
| 273   | 13.2                     | 5.4                     | 12.0                    |
| 283   | 13.5                     | 6.0                     | 12.0                    |
| 293   | 13.8                     | 6.6                     | 11.4                    |
| 303   | 13.2                     | 6.6                     | 10.2                    |
| 313   | 13.2                     | 7.2                     | 9.6                     |
| 323   |                          | 8.4                     | 8.4                     |
| 333   | 13.5                     | 9.6                     | 6.6                     |

Peptide 10 (X=NO<sub>2</sub>)

| T (K) | ${}^2J_{\beta_1\beta_2}$ | ${}^3J_{\alpha\beta_1}$ | ${}^3J_{\alpha\beta_2}$ |
|-------|--------------------------|-------------------------|-------------------------|
| 273   | 13.2                     | 5.4                     | 12.0                    |
| 283   | 13.8                     | 5.4                     | 11.4                    |
| 293   | 13.5                     | 5.4                     | 11.4                    |
| 303   | 13.8                     | 6.0                     | 10.8                    |
| 313   | 13.5                     | 6.0                     | 10.2                    |
| 323   | 13.2                     | 6.6                     | 9.6                     |
| 333   |                          | 7.8                     | 7.8                     |

**Chemical structures of *d*ASC and T3ASC as reference peptides.**

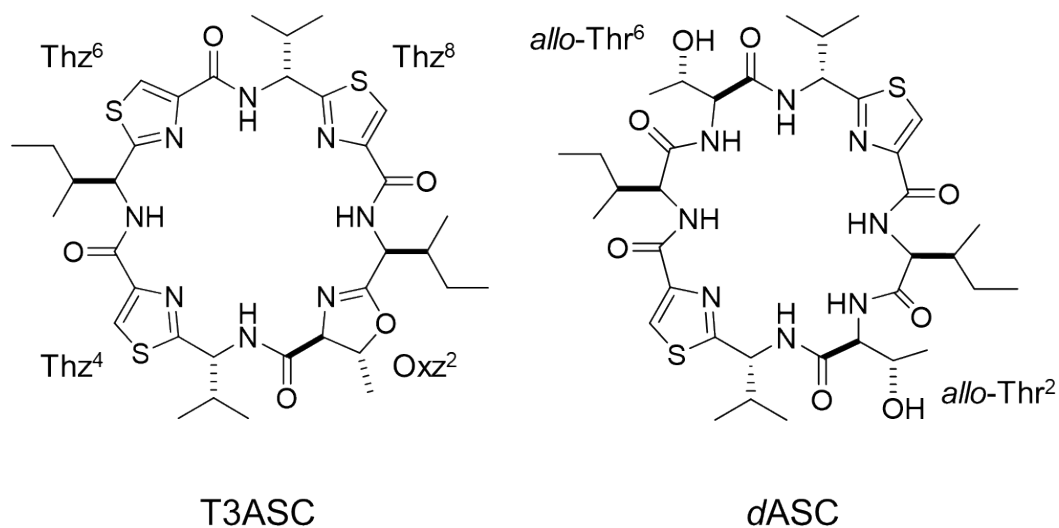

**Fig. S35** Chemical structures of T3ASC (A. Asano *et al.*, *J. Pept. Sci.*, 2018, e3120) and *d*ASC (A. Asano *et al.*, *Biopolymers*, 2001, **58**, 295–304). T3ASC and *d*ASC were used as reference peptides to provide reference chemical shifts for the fully square and folded forms, respectively.
